# Supplementary material for: Gold-catalyzed intermolecular formal (3+2) cycloaddition of stabilized vinyldiazo derivatives and electronically unbiased allenes
Source: Royal Society of Chemistry journal article supplement (doi:10.1039/c6cc04106j), 2016-01-01

## Gold-Catalyzed Intermolecular Formal (3+2) Cycloaddition of Stabilized Vinyldiazo Derivatives and Electronically Unbiased Allenes

Enol López,<sup>a,b</sup> Giacomo Lonzi,<sup>a,b</sup> Javier González,<sup>a</sup> and Luis A. López<sup>a,b\*</sup>

<sup>a</sup> Departamento de Química Orgánica e Inorgánica and <sup>b</sup> Instituto Universitario de Química Organometálica "Enrique Moles"  
Universidad de Oviedo, c/ Julián Clavería 8, 33006-Oviedo, Spain

### TABLE OF CONTENTS

|     |                                                                   |      |
|-----|-------------------------------------------------------------------|------|
| 1.  | General Considerations                                            | S-2  |
| 2.  | Summary of Catalyst Screening                                     | S-3  |
| 3.  | General Procedure for the Synthesis of Compounds <b>3</b>         | S-4  |
| 4.  | Characterization Data of Compounds <b>3</b>                       | S-5  |
| 5.  | Reaction with phenyl-1,2-propadiene ( <b>2i</b> )                 | S-14 |
| 6.  | General Procedure for the Synthesis of Compounds <b>4</b>         | S-15 |
| 7.  | Characterization Data of Compounds <b>4</b>                       | S-16 |
| 8.  | Reaction with cyclohexyl-1,2-propadiene ( <b>2k</b> )             | S-18 |
| 9.  | Computational study                                               | S-19 |
| 10. | References                                                        | S-29 |
| 11. | <sup>1</sup> H- and <sup>13</sup> C-NMR spectra for new compounds | S-30 |

## 1. General Considerations

All reactions were carried out under nitrogen using standard Schlenk techniques. Dichloromethane and 1,2-dichloroethane were distilled from CaH<sub>2</sub>. The solvents used in column chromatography, hexane and ethyl acetate, were obtained from commercial suppliers and used without further purification. TLC was performed on aluminum-backed plates coated with silica gel 60 with F<sub>254</sub> indicator. Flash column chromatography was carried out on silica gel (230-240 mesh). <sup>1</sup>H NMR (300, 400 MHz) and <sup>13</sup>C NMR (75.5 and 100 MHz) spectra were recorded at room temperature in CDCl<sub>3</sub> on a Bruker DPX-300, or Bruker AVANCE-300 MHz and 400 MHz instruments. Chemical shifts are given in ppm relative to TMS (<sup>1</sup>H, 0.0 ppm) or CDCl<sub>3</sub> (<sup>13</sup>C, 77.0 ppm). 2D NMR experiments were recorded on a Bruker AVANCE-400 MHz. High-resolution mass spectra were determined on a VG Autospec M mass spectrometer. This study was carried out using vinyl diazoacetates **1a-g**<sup>1</sup> and allenes **2a-k**<sup>2</sup> (Figure S1), which were prepared according to well-known procedures previously described in the literature. Allene [D]-**2k** was prepared following the procedure developed by Moreau and Gaudemar.<sup>3</sup> [Au(IPr)(CH<sub>3</sub>CN)]SbF<sub>6</sub> was prepared according to a literature procedure.<sup>4</sup> All other reagents used in this work were of the best commercial grade available and used without further purification.

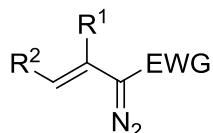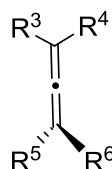

**1a** (R<sup>1</sup> = H; R<sup>2</sup> = H; EWG = COOEt)

**1b** (R<sup>1</sup> = H; R<sup>2</sup> = H; EWG = COOBn)

**1c** (R<sup>1</sup> = H; R<sup>2</sup> = H; EWG = COOtBu)

**1d** (R<sup>1</sup> = Me; R<sup>2</sup> = H; EWG = COOEt)

**1e** (R<sup>1</sup> = OTBS; R<sup>2</sup> = H; EWG = COOEt)

**1f** (R<sup>1</sup> = H; R<sup>2</sup> = EWG = COOEt)

**1g** (R<sup>1</sup> = Me; R<sup>2</sup> = H; EWG = COMe)

**2a** (R<sup>3</sup> = R<sup>4</sup> = Me; R<sup>5</sup> = R<sup>6</sup> = H)

**2b** (R<sup>3</sup>, R<sup>4</sup> = (CH<sub>2</sub>)<sub>5</sub>; R<sup>5</sup> = R<sup>6</sup> = H)

**2c** (R<sup>3</sup>, R<sup>4</sup> = (CH<sub>2</sub>)<sub>2</sub>CH<sup>t</sup>Bu(CH<sub>2</sub>)<sub>2</sub>; R<sup>5</sup> = R<sup>6</sup> = H)

**2d** (R<sup>3</sup> = R<sup>4</sup> = Bn; R<sup>5</sup> = R<sup>6</sup> = H)

**2e** (R<sup>3</sup> = R<sup>4</sup> = Ph; R<sup>5</sup> = R<sup>6</sup> = H)

**2f** (R<sup>3</sup> = R<sup>4</sup> = PMP; R<sup>5</sup> = R<sup>6</sup> = H)

**2g** (R<sup>3</sup> = Ph; R<sup>4</sup> = Me; R<sup>5</sup> = R<sup>6</sup> = H)

**2h** (R<sup>3</sup> = TMS; R<sup>4</sup> = Me; R<sup>5</sup> = R<sup>6</sup> = H)

**2i** (R<sup>3</sup> = Ph; R<sup>4</sup> = R<sup>5</sup> = R<sup>6</sup> = H)

**2j** (R<sup>3</sup> = R<sup>4</sup> = R<sup>5</sup> = R<sup>6</sup> = Me)

**2k** (R<sup>3</sup> = Cy; R<sup>4</sup> = R<sup>5</sup> = R<sup>6</sup> = H)

[D]-**2k** (R<sup>3</sup> = Cy; R<sup>4</sup> = D; R<sup>5</sup> = R<sup>6</sup> = H)

**Figure S1.** Starting materials used in this work

## 2. Summary of the Catalyst Screening

**Table S1.** Summary of the Catalyst Screening for the Reaction of Diazo Compound **1a** and 3-methylpropa-1,2-diene (**2a**)

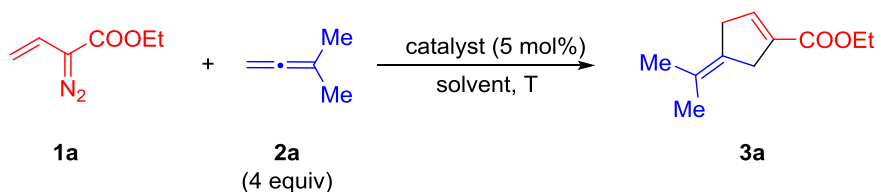

| entry     | catalyst                                   | solvent                             | T (°C)    | 3a (%) <sup>a</sup> |
|-----------|--------------------------------------------|-------------------------------------|-----------|---------------------|
| 1         | CuBr                                       | CH <sub>2</sub> Cl <sub>2</sub>     | RT        | -                   |
| 2         | CuBr                                       | THF                                 | RT        | -                   |
| 3         | [Cu(MeCN) <sub>4</sub> ][BF <sub>4</sub> ] | CH <sub>2</sub> Cl <sub>2</sub>     | RT        | -                   |
| 4         | Cu(OTf) <sub>2</sub>                       | CH <sub>2</sub> Cl <sub>2</sub>     | RT        | -                   |
| 5         | Rh <sub>2</sub> (OAc) <sub>4</sub>         | CH <sub>2</sub> Cl <sub>2</sub>     | RT        | -                   |
| 6         | AgSbF <sub>6</sub>                         | CH <sub>2</sub> Cl <sub>2</sub>     | RT        | 17                  |
| 7         | AuCl <sub>3</sub>                          | CH <sub>2</sub> Cl <sub>2</sub>     | RT        | -                   |
| 8         | AuCl                                       | CH <sub>2</sub> Cl <sub>2</sub>     | RT        | -                   |
| 9         | (Ph <sub>3</sub> P)AuNTf <sub>2</sub>      | CH <sub>2</sub> Cl <sub>2</sub>     | RT        | -                   |
| 10        | (JohnPhos)AuNTf <sub>2</sub>               | CH <sub>2</sub> Cl <sub>2</sub>     | RT        | 49                  |
| 11        | (IPr)AuNTf <sub>2</sub>                    | CH <sub>2</sub> Cl <sub>2</sub>     | RT        | 36                  |
| <b>12</b> | <b>[IPrAu(MeCN)][SbF<sub>6</sub>]</b>      | <b>CH<sub>2</sub>Cl<sub>2</sub></b> | <b>RT</b> | <b>75</b>           |
| 13        | [IPrAu(MeCN)][SbF <sub>6</sub> ]           | DCE                                 | 50        | 23                  |
| 14        | [IPrAu(MeCN)][SbF <sub>6</sub> ]           | DMF                                 | RT        | 5                   |

<sup>a</sup> Yield of isolated product after column chromatography.

### 3. General Procedure for the Synthesis of Compounds 3

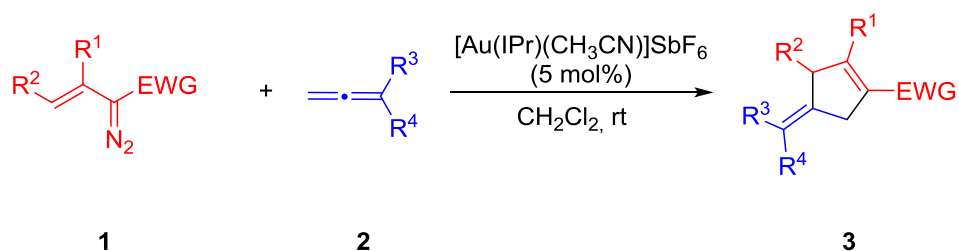

[Au(IPr)(CH<sub>3</sub>CN)]SbF<sub>6</sub> (21.6 mg, 0.025 mmol, 5 mol%) was added to a solution of vinyl diazo compound **1** (0.5 mmol) and the corresponding allene **2** (2 mmol) in CH<sub>2</sub>Cl<sub>2</sub> (5 mL). The mixture was stirred at room temperature until the disappearance of the starting diazo compound (monitored by TLC: 4-12 h). The solvent was removed under reduced pressure and the resulting residue was purified by flash chromatography (silica gel; hexanes/ethyl acetate mixtures) to afford the (3+2) cycloadducts as colorless oils.

The reaction of diethyl (*E*)-4-diazopent-2-enedioate (**1f**) and 3-methylbuta-1,2-diene (**2a**) was performed at 50°C in dichloroethane.

#### 4. Characterization Data of Compounds 3

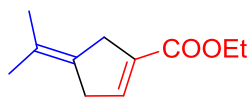

**3a**

**Ethyl 4-(propan-2-ylidene)cyclopent-1-ene-1-carboxylate (3a).** The general procedure was followed using ethyl 2-diazobut-3-enoate (**1a**, 70 mg, 0.5 mmol) and 3-methylbuta-1,2-diene (**2a**, 136 mg, 2.0 mmol). Final chromatographic purification (silica gel; hexanes/ethyl acetate 20:1) afforded compound **3a** (68 mg, 75%) as a colorless oil.

<sup>1</sup>H-NMR: 1.30 (t, *J* = 7.2 Hz, 3H), 1.63 (s, 3H), 1.66 (s, 3H), 3.16 (s, 2H), 3.22 (s, 2H), 4.21 (q, *J* = 7.2 Hz, 2H), 6.79-6.81 (m, 1H); <sup>13</sup>C-NMR: 14.3, 20.7, 20.9, 36.2, 38.0, 60.1, 124.4, 129.8, 135.7, 142.2, 165.1; HRMS (EI) calculated for [C<sub>11</sub>H<sub>16</sub>O<sub>2</sub>]<sup>+</sup> (M<sup>+</sup>): 180.1150, found 180.1153.

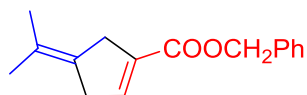

**3b**

**Benzyl 4-(propan-2-ylidene)cyclopent-1-ene-1-carboxylate (3b).** The general procedure was followed using benzyl 2-diazobut-3-enoate (**1b**, 101 mg, 0.5 mmol) and 3-methylbuta-1,2-diene (**2a**, 136 mg, 2.0 mmol). Final chromatographic purification (silica gel; hexanes/ethyl acetate 20:1) afforded compound **3b** (102 mg, 84%) as a colorless oil.

<sup>1</sup>H-NMR: 1.66 (s, 3H), 1.68 (s, 3H), 3.19 (s, 2H), 3.28 (s, 2H), 5.24 (s, 2H), 6.88-6.91 (m, 1H), 7.37-7.41 (m, 5H); <sup>13</sup>C-NMR: 20.8, 21.0, 36.2, 38.1, 65.9, 124.5, 128.1, 128.5, 129.6, 135.4, 136.3, 143.0, 164.8; HRMS (EI) calculated for [C<sub>16</sub>H<sub>18</sub>O<sub>2</sub>]<sup>+</sup> (M<sup>+</sup>): 242.1307, found 242.1303.

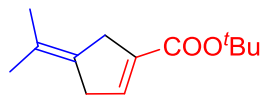

**3c**

**tert-butyl 4-(propan-2-ylidene)cyclopent-1-ene-1-carboxylate (3c).** The general procedure was followed using *tert*-butyl 2-diazobut-3-enoate (**1c**, 84 mg, 0.5 mmol) and 3-methylbuta-1,2-diene (**2a**, 136 mg, 2.0 mmol). Final chromatographic purification (silica gel; hexanes/ethyl acetate 20:1) afforded compound **3c** (68 mg, 65%) as a colorless oil.

$^1\text{H-NMR}$ : 1.51 (s, 9H), 1.64 (s, 3H), 1.66 (s, 3H), 3.15 (s, 2H), 3.19 (s, 2H), 6.71-6.72 (m, 1H);  $^{13}\text{C-NMR}$ : 20.7, 20.9, 28.2, 36.2, 37.9, 80.1, 124.1, 130.1, 137.3, 141.1, 164.6; **HRMS** (EI) calculated for  $[\text{C}_{13}\text{H}_{20}\text{O}_2]^+$  ( $\text{M}^+$ ): 208.1463, found 208.1467.

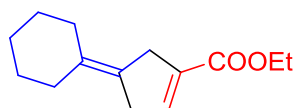

**3d**

**Ethyl 4-cyclohexylidenecyclopent-1-ene-1-carboxylate (3d)**. The general procedure was followed using ethyl 2-diazobut-3-enoate (**1a**, 70 mg, 0.5 mmol) and vinylidene-cyclohexane (**2b**, 216 mg, 2.0 mmol). Final chromatographic purification (silica gel; hexanes/ethyl acetate 40:1) afforded compound **3d** (78 mg, 71%) as a colorless oil.

$^1\text{H-NMR}$ : 1.32 (t,  $J = 7.2$  Hz, 3H), 1.51-1.57 (m, 6H), 2.07-2.11 (m, 4H), 3.20 (s, 2H), 3.26 (s, 2H), 4.22 (q,  $J = 7.2$  Hz, 2H), 6.83 (m, 1H);  $^{13}\text{C-NMR}$ : 14.3, 26.5, 27.4, 31.3, 31.5, 35.5, 37.3, 60.1, 126.3, 132.5, 135.6, 142.2, 165.2; **HRMS** (EI) calculated for  $[\text{C}_{14}\text{H}_{20}\text{O}_2]^+$  ( $\text{M}^+$ ): 220.1463, found 220.1459.

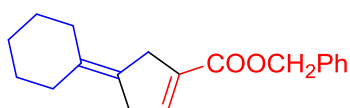

**3e**

**Benzyl 4-cyclohexylidenecyclopent-1-ene-1-carboxylate (3e)**. The general procedure was followed using benzyl 2-diazobut-3-enoate (**1b**, 101 mg, 0.5 mmol) and vinylidene-cyclohexane (**2b**, 216 mg, 2.0 mmol). Final chromatographic purification (silica gel; hexanes/ethyl acetate 40:1) afforded compound **3e** (97 mg, 69%) as a colorless oil.

$^1\text{H-NMR}$ : 1.50-1.55 (m, 6H), 2.06-2.11 (m, 4H), 3.22 (s, 2H), 3.30 (s, 2H), 5.23 (s, 2H), 6.89-6.90 (m, 1H), 7.34-7.41 (m, 5H);  $^{13}\text{C-NMR}$ : 26.6, 27.39, 27.42, 31.3, 31.5, 35.5, 37.4, 65.9, 126.1, 128.0, 128.1, 128.5, 132.6, 135.3, 136.3, 143.0, 164.9; **HRMS** (EI) calculated for  $[\text{C}_{19}\text{H}_{22}\text{O}_2]^+$  ( $\text{M}^+$ ): 282.1620, found 282.1616.

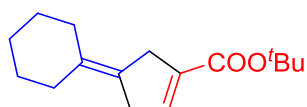

**3f**

**tert-Butyl 4-cyclohexylidenecyclopent-1-ene-1-carboxylate (3f).** The general procedure was followed using *tert*-butyl 2-diazobut-3-enoate (**1c**, 84 mg, 0.5 mmol) and vinylidene-cyclohexane (**2b**, 216 mg, 2.0 mmol). Final chromatographic purification (silica gel; hexanes/ethyl acetate 40:1) afforded compound **3f** (79 mg, 64%) as a colorless oil.

<sup>1</sup>H-NMR: 1.50-1.54 (m + s, 15H), 2.06-2.11 (m, 4H), 3.18 (s, 2H), 3.21 (s, 2H), 6.71-6.73 (m, 1H); <sup>13</sup>C-NMR: 26.6, 27.4, 28.2, 31.3, 31.5, 35.5, 37.2, 80.0, 126.6, 132.3, 137.2, 141.1, 164.6; HRMS (EI) calculated for [C<sub>16</sub>H<sub>24</sub>O<sub>2</sub>]<sup>+</sup> (M<sup>+</sup>): 248.1776, found 248.1779.

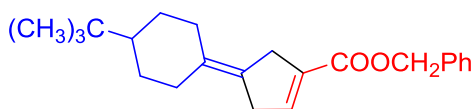

**3g**

**Benzyl 4-(4-(tert-butyl)cyclohexylidene)cyclopent-1-ene-1-carboxylate (3g).** The general procedure was followed using benzyl 2-diazobut-3-enoate (**1b**, 101 mg, 0.5 mmol) and 1-(*tert*-butyl)-4-vinylidene-cyclohexane (**2c**, 329 mg, 2.0 mmol). Final chromatographic purification (silica gel; hexanes/ethyl acetate 40:1) afforded compound **3g** (115 mg, 68%) as a colorless oil.

<sup>1</sup>H-NMR: 0.87 (s, 9H), 0.94-1.19 (m, 3H), 1.77-1.86 (m, 4H), 2.38-2.49 (m, 2H), 3.12-3.38 (m, 4H), 5.22 (s, 2H), 6.88-6.91 (m, 1H), 7.34-7.41 (m, 5H); <sup>13</sup>C-NMR: 27.6, 28.0, 31.2, 31.4, 32.5, 35.6, 37.4, 48.1, 65.9, 125.8, 128.0, 128.5, 132.5, 135.3, 136.3, 143.0, 164.9; HRMS (EI) calculated for [C<sub>23</sub>H<sub>30</sub>O<sub>2</sub>]<sup>+</sup> (M<sup>+</sup>): 338.2246, found 338.2244.

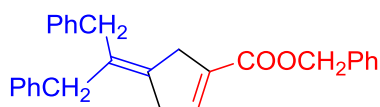

**3h**

**Benzyl 4-(1,3-diphenylpropan-2-ylidene)cyclopent-1-ene-1-carboxylate (3h).** The general procedure was followed using benzyl 2-diazobut-3-enoate (**1b**, 101 mg, 0.5 mmol) and 1,1-dibenzylpropa-1,2-diene (**2d**, 440 mg, 2.0 mmol). Final chromatographic purification (silica gel; hexanes/ethyl acetate 40:1) afforded compound **3h** (118 mg, 60%) as a colorless oil.

<sup>1</sup>H-NMR: 3.32 (s, 2H), 3.36 (s, 2H), 3.45 (br s, 2H), 3.57 (br s, 2H), 5.27 (s, 2H), 6.96-6.97 (m, 1H), 7.13-7.37 (m, 15H); <sup>13</sup>C-NMR: 36.6, 37.9, 38.3, 38.4, 66.1, 126.1, 128.2, 128.5, 128.6, 128.7, 131.1, 134.3, 135.2, 136.2, 139.5, 139.6, 142.6, 164.7; HRMS (EI) calculated for [C<sub>28</sub>H<sub>26</sub>O<sub>2</sub>]<sup>+</sup> (M<sup>+</sup>): 394.1933, found 394.1938.

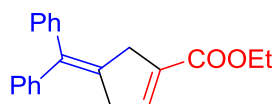

**3i**

**Ethyl 4-(diphenylmethylene)cyclopent-1-ene-1-carboxylate (3i).** The general procedure was followed using ethyl 2-diazobut-3-enoate (**1a**, 70 mg, 0.5 mmol) and 1,1-diphenylpropa-1,2-diene (**2e**, 384 mg, 2.0 mmol). Final chromatographic purification (silica gel; hexanes/ethyl acetate 40:1) afforded compound **3i** (134 mg, 88%) as a colorless oil.

<sup>1</sup>H-NMR: 1.30 (t, *J* = 7.2 Hz, 3H), 3.37 (d, *J* = 2.7 Hz, 2H), 3.46 (d, *J* = 1.8 Hz, 2H), 4.22 (q, *J* = 7.2 Hz, 2H), 6.81-6.83 (m, 1H), 7.22-7.37 (m, 10H); <sup>13</sup>C-NMR: 14.7, 38.2, 40.2, 60.7, 127.0, 128.8, 129.1, 135.8, 136.7, 137.4, 141.7, 142.7, 142.8, 165.2; HRMS (EI) calculated for [C<sub>21</sub>H<sub>20</sub>O<sub>2</sub>]<sup>+</sup> (M<sup>+</sup>): 304.1463, found 304.1466.

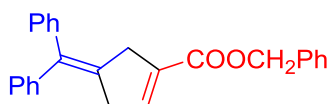

**3j**

**Benzyl 4-(diphenylmethylene)cyclopent-1-ene-1-carboxylate (3j).** The general procedure was followed using benzyl 2-diazobut-3-enoate (**1b**, 101 mg, 0.5 mmol) and 1,1-diphenylpropa-1,2-diene (**2e**, 384 mg, 2.0 mmol). Final chromatographic purification (silica gel; hexanes/ethyl acetate 40:1) afforded compound **3j** (128 mg, 70%) as a colorless oil.

<sup>1</sup>H-NMR: 3.38 (d, *J* = 2.4 Hz, 2H), 3.50 (d, *J* = 2.1 Hz, 2H), 5.23 (s, 2H), 6.87-6.89 (m, 1H), 7.23-7.40 (m, 15H); <sup>13</sup>C-NMR: 37.8, 39.8, 66.0, 126.6, 128.2, 128.4, 128.5, 128.6, 128.7, 135.0, 136.2, 136.5, 136.8, 142.1, 142.4, 164.5; HRMS (EI) calculated for [C<sub>26</sub>H<sub>22</sub>O<sub>2</sub>]<sup>+</sup> (M<sup>+</sup>): 366.1620, found 366.1620.

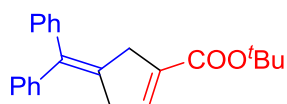

**3k**

**tert-Butyl 4-(diphenylmethylene)cyclopent-1-ene-1-carboxylate (3k).** The general procedure was followed using *tert*-butyl 2-diazobut-3-enoate (**1c**, 84 mg, 0.5 mmol) and 1,1-diphenylpropa-1,2-diene (**2e**, 384 mg, 2.0 mmol). Final chromatographic purification (silica gel; hexanes/ethyl acetate 40:1) afforded compound **3k** (115 mg, 69%) as a colorless oil.



<sup>1</sup>H-NMR: 1.51 (s, 9H), 3.35 (d, *J* = 2.7 Hz, 2H), 3.44 (d, *J* = 2.1 Hz, 2H), 6.71-6.72 (m, 1H), 7.22-7.28 (m, 6H), 7.32-7.36 (m, 4H); <sup>13</sup>C-NMR: 28.2, 37.9, 39.7, 80.3, 126.5, 128.3, 128.4, 128.7, 128.8, 136.2, 136.9, 137.3, 140.2, 142.3, 142.5, 164.3; HRMS (EI) calculated for [C<sub>23</sub>H<sub>24</sub>O<sub>2</sub>]<sup>+</sup> (M<sup>+</sup>): 332.1776, found 332.1779.

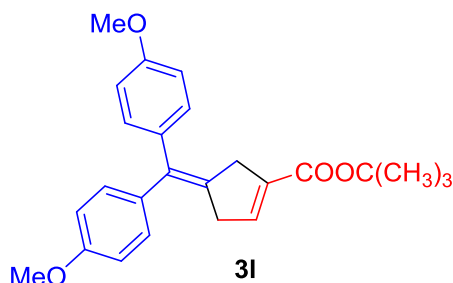

**tert-Butyl 4-(bis(4-methoxyphenyl)methylene)cyclopent-1-ene-1-carboxylate (3l).** The general procedure was followed using *tert*-butyl 2-diazobut-3-enoate (**1c**, 84 mg, 0.5 mmol) and 1,1-di(4-methoxyphenyl)propa-1,2-diene (**2f**, 504 mg, 2.0 mmol). Final chromatographic purification (silica gel; hexanes/ethyl acetate 40:1) afforded compound **3l** (98 mg, 50%) as a colorless oil.

<sup>1</sup>H-NMR: 1.49 (s, 9H), 3.32 (d, *J* = 2.4 Hz, 2H), 3.40 (d, *J* = 1.8 Hz, 2H), 3.82 (s, 6H), 6.70 (t, *J* = 2.1 Hz, 1H), 6.84-6.88 (m, 4H), 7.11-7.17 (m, 4H); <sup>13</sup>C-NMR: 28.6, 38.3, 40.2, 55.6, 80.7, 114.0, 114.05, 130.2, 130.3, 135.5, 135.7, 136.4, 137.3, 140.7, 158.4, 164.8; HRMS (EI) calculated for [C<sub>25</sub>H<sub>28</sub>O<sub>4</sub>]<sup>+</sup> (M<sup>+</sup>): 392.1988, found 392.1985.

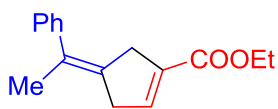

**Ethyl (Z)-4-(1-phenylethylidene)cyclopent-1-ene-1-carboxylate (3m).** The general procedure was followed using ethyl 2-diazobut-3-enoate (**1a**, 70 mg, 0.5 mmol) and 3-phenylbuta-1,2-diene (**2g**, 260 mg, 2.0 mmol). Final chromatographic purification (silica gel; hexanes/ethyl acetate 40:1) afforded compound **3m** (84 mg, 69%) as a 15:1 *Z/E* mixture as a colorless oil.

<sup>1</sup>H-NMR: 1.28 (t, *J* = 7.2 Hz, 3H), 2.01 (s, 3H), 3.27 (s, 2H), 3.36 (s, 2H), 4.19 (q, *J* = 7.2 Hz, 2H), 6.85-6.88 (m, 1H), 7.24-7.27 (m, 3H), 7.33-7.38 (m, 2H); <sup>13</sup>C-NMR: 14.7, 21.4, 37.4, 39.4, 60.6, 126.7, 127.8, 128.6, 130.2, 134.1, 136.5, 141.5, 144.2, 165.3; HRMS (EI) calculated for [C<sub>16</sub>H<sub>18</sub>O<sub>2</sub>]<sup>+</sup> (M<sup>+</sup>): 242.1307, found 242.1305.

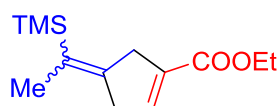

**3n**

**Ethyl 4-(1-(trimethylsilyl)ethylidene)cyclopent-1-ene-1-carboxylate (3n).** The general procedure was followed using ethyl 2-diazobut-3-enoate (**1a**, 70 mg, 0.5 mmol) and 3-trimethylsilylbuta-1,2-diene (**2h**, 252 mg, 2.0 mmol).  $^1\text{H-NMR}$  analysis of the crude reaction mixture revealed that two isomers were formed in about 4:1 ratio. Chromatographic work-up (silica gel; hexanes) allowed the isolation of the major isomer in pure form (**3n**, 55 mg, 46%) as a colorless oil. The configuration of this isomer could not be unambiguously assigned due to overlapping of key signals in the  $^1\text{H-NMR}$  spectrum.

$^1\text{H-NMR}$  ( $\text{CD}_2\text{Cl}_2$ ): 0.23 (s, 9H), 1.32 (t,  $J = 7.2$  Hz, 3H), 2.01 (s, 2H), 2.07 (s, 5H, accidental equivalence of methyl and methylene groups), 4.21 (q,  $J = 7.2$  Hz, 2H), 6.89 (br s, 1H);  $^{13}\text{C-NMR}$  ( $\text{CD}_2\text{Cl}_2$ ): -0.2, 14.0, 20.2, 22.8, 25.7, 60.2, 134.1, 134.3, 137.6, 138.0, 167.3; **HRMS** (EI) calculated for  $[\text{C}_{13}\text{H}_{22}\text{O}_2\text{Si}]^+$  ( $\text{M}^+$ ): 238.1389, found 238.1386.

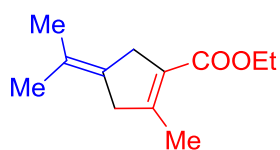

**3o**

**Ethyl 2-methyl-4-(propan-2-ylidene)cyclopent-1-ene-1-carboxylate (3o).** The general procedure was followed using ethyl 2-diazo-3-methylbut-3-enoate (**1d**, 77 mg, 0.5 mmol) and 3-methylbuta-1,2-diene (**2a**, 136 mg, 2.0 mmol). Final chromatographic purification (silica gel; hexanes/ethyl acetate 100:1) afforded compound **3o** (54 mg, 56%) as a colorless oil. An unknown byproduct with identical mass (GC-MS analysis) was observed in the  $^1\text{H}$  NMR spectrum. On the basis of similar results with other allene derivatives, this byproduct is supposed to be ethyl 3,6-dimethyl-5-methylenehepta-2,6-dienoate.

$^1\text{H-NMR}$ : 1.32 (t,  $J = 7.2$  Hz, 3H), 1.64 (s, 3H), 1.66 (s, 3H), 2.17 (s, 3H), 3.16 (br s, 2H), 3.27 (br s, 2H), 4.24 (q,  $J = 7.2$  Hz, 2H);  $^{13}\text{C-NMR}$ : 14.4, 16.3, 20.6, 20.7, 38.3, 45.1, 59.7, 123.4, 126.5, 128.4, 154.1, 166.1; **HRMS** (EI) calculated for  $[\text{C}_{12}\text{H}_{18}\text{O}_2]^+$  ( $\text{M}^+$ ): 194.1307, found 194.1305.

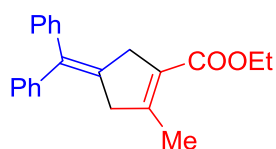

**3p**

**Ethyl 4-(diphenylmethylene)-2-methylcyclopent-1-ene-1-carboxylate (3p).** The general procedure was followed using ethyl 2-diazo-3-methylbut-3-enoate (**1d**, 77 mg, 0.5 mmol) and 1,1-diphenylpropa-1,2-diene (**2e**, 384 mg, 2.0 mmol). Final chromatographic purification (silica gel; hexanes/ethyl acetate 40:1) afforded compound **3p** (48 mg, 30%) and **3p'** (24 mg, 15%) as colorless oils.

<sup>1</sup>H-NMR: 1.30 (t, *J* = 7.2 Hz, 3H), 2.14 (s, 3H), 3.36 (s, 2H), 3.51 (s, 2H), 4.21 (q, *J* = 7.2 Hz, 2H), 7.23-7.38 (m, 10H); <sup>13</sup>C-NMR: 14.4, 16.1, 39.8, 46.7, 59.8, 126.2, 126.5, 128.4, 128.8, 135.4, 135.7, 142.2, 142.6, 153.4, 165.8; HRMS (EI) calculated for [C<sub>22</sub>H<sub>22</sub>O<sub>2</sub>]<sup>+</sup> (M<sup>+</sup>): 318.1620, found 318.1620.

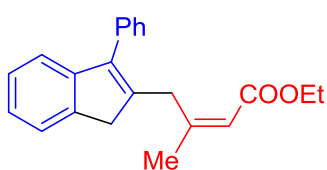

**3p'**

**Ethyl (Z)-3-methyl-4-(3-phenyl-1H-inden-2-yl)but-2-enoate (3p').** <sup>1</sup>H-NMR: 1.33 (t, *J* = 7.2 Hz, 3H), 1.71 (s, 3H), 3.46 (s, 2H), 3.97 (s, 2H), 4.21 (q, *J* = 7.2 Hz, 2H), 5.76 (s, 1H), 7.19-7.45 (m, 9H); <sup>13</sup>C-NMR: 14.3, 24.6, 32.3, 40.4, 59.7, 117.2, 119.7, 123.5, 124.4, 126.2, 127.3, 128.4, 128.5, 129.2, 135.2, 140.8, 141.3, 142.7, 157.5, 166.4; HRMS (EI) calculated for [C<sub>22</sub>H<sub>22</sub>O<sub>2</sub>]<sup>+</sup> (M<sup>+</sup>): 318.1620, found 318.1621. The Z configuration of **3p'** was determined by NOE experiments.

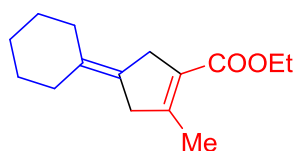

**3q**

**Ethyl 4-cyclohexylidene-2-methylcyclopent-1-ene-1-carboxylate (3q).** The general procedure was followed using ethyl 2-diazo-3-methylbut-3-enoate (**1d**, 77 mg, 0.5 mmol) and

vinylidenecyclohexane (**2b**, 216 mg, 2.0 mmol). Final chromatographic purification (silica gel; hexanes/ethyl acetate 100:1) afforded compound **3q** (33 mg, 28%) and **3q'** (27 mg, 23%) as colorless oils.

<sup>1</sup>H-NMR: 1.32 (t, *J* = 7.2 Hz, 3H), 1.46-1.55 (m, 6H), 2.01-2.15 (m + s, 7H), 3.20 (br s, 2H), 3.30 (br s, 2H), 4.22 (q, *J* = 7.2 Hz, 2H); <sup>13</sup>C-NMR: 14.4, 16.3, 26.6, 27.4, 31.1, 31.3, 37.6, 44.4, 59.6, 124.8, 126.4, 131.6, 154.1, 166.1; HRMS (EI) calculated for [C<sub>15</sub>H<sub>22</sub>O<sub>2</sub>]<sup>+</sup> (M<sup>+</sup>): 234.1620, found 234.1622.

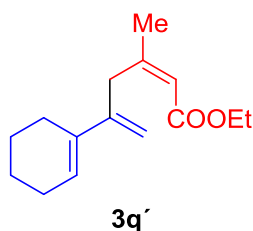

**Ethyl (Z)-5-(cyclohex-1-en-1-yl)-3-methylhexa-2,5-dienoate (3q')**. <sup>1</sup>H-NMR: 1.29 (t, *J* = 7.2 Hz, 3H), 1.54-1.72 (m, 2H), 1.82 (s, 3H), 2.10-2.26 (m, 4H), 3.39 (s, 2H), 4.17 (q, *J* = 7.2 Hz, 2H), 4.79 (s, 1H), 5.08 (s, 1H), 5.80 (br s, 1H), 5.93 (t, *J* = 3.9 Hz, 3H); <sup>13</sup>C-NMR: 14.3, 22.1, 22.9, 24.6, 25.9, 26.0, 37.4, 59.5, 110.3, 117.1, 125.0, 135.8, 145.0, 158.8, 166.4; HRMS (EI) calculated for [C<sub>15</sub>H<sub>22</sub>O<sub>2</sub>]<sup>+</sup> (M<sup>+</sup>): 234.1620, found 234.1620. The Z configuration of **3q'** was determined by NOE experiments.

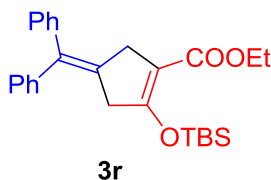

**Ethyl 2-(tert-butyldimethylsilyloxy)-4-(diphenylmethylene)cyclopent-1-ene-1-carboxylate (3r)**. The general procedure was followed using ethyl 3-((tert-butyldimethylsilyl)oxy)-2-diazobut-3-enoate (**1e**, 135 mg, 0.5 mmol) and 1,1-diphenylpropa-1,2-diene (**2e**, 384 mg, 2.0 mmol). Final chromatographic purification (silica gel; hexanes/ethyl acetate 20:1) afforded compound **3r** (55 mg, 25%) as a colorless oil.

<sup>1</sup>H-NMR: 0.19 (s, 6H), 0.97 (s, 9H), 1.28 (t, *J* = 7.2 Hz, 3H), 3.32 (s, 2H), 3.40 (s, 2H), 4.19 (q, *J* = 7.2 Hz, 2H), 7.19-7.33 (m, 10H); <sup>13</sup>C-NMR: -3.7, 14.8, 18.4, 25.7, 36.5, 42.3, 59.6, 107.7, 126.8, 128.5, 128.6, 128.8, 129.0, 132.4, 136.6, 141.8, 142.5, 162.1, 165.0; HRMS (EI) calculated for [C<sub>27</sub>H<sub>34</sub>O<sub>3</sub>Si]<sup>+</sup> (M<sup>+</sup>): 434.2277, found 434.2271.

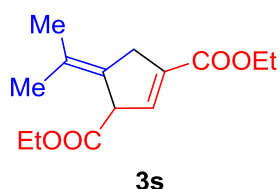

**Diethyl 4-(propan-2-ylidene)cyclopent-1-ene-1,3-dicarboxylate (3s).** The general procedure was followed using diethyl (*E*)-4-diazopent-2-enedioate (**1f**, 106 mg, 0.5 mmol) and 3-methylbuta-1,2-diene (**2a**, 136 mg, 2.0 mmol). Final chromatographic purification (silica gel; hexanes/ethyl acetate 40:1) afforded compound **3s** (53 mg, 42%) as a colorless oil.

**<sup>1</sup>H-NMR:** 1.29 (t, *J* = 7.2 Hz, 3H), 1.32 (t, *J* = 7.2 Hz, 3H), 1.68 (s, 3H), 1.72 (s, 3H), 3.22-3.40 (m, 2H), 4.16 (q, *J* = 7.2 Hz, 2H), 4.23 (t, *J* = 7.2 Hz, 2H), 4.27-4.30 (m, 1H), 6.68-6.71 (m, 1H); **<sup>13</sup>C-NMR:** 14.2, 14.3, 20.9, 21.4, 36.4, 55.1, 60.5, 61.1, 128.5, 128.9, 138.6, 138.9, 164.6, 171.4; **HRMS (EI)** calculated for [C<sub>14</sub>H<sub>20</sub>O<sub>4</sub>]<sup>+</sup> (M<sup>+</sup>): 252.1362, found 252.1361.

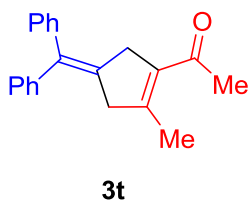

**1-[4-(diphenylmethylene)-2-methylcyclopent-1-en-1-yl]ethan-1-one (3t).** The general procedure was followed using 3-diazo-4-methylpent-4-en-2-one (**1g**, 62 mg, 0.5 mmol) and 1,1-diphenylpropa-1,2-diene (**2e**, 384 mg, 2.0 mmol). Final chromatographic purification (silica gel; hexanes/ethyl acetate 20:1) afforded compound **3t** (58 mg, 40%) as a colorless oil.

**<sup>1</sup>H-NMR:** 2.12 (s, 3H), 2.26 (s, 3H), 3.39 (s, 2H), 3.54 (s, 2H), 7.21-7.37 (m, 10H); **<sup>13</sup>C-NMR:** 16.7, 30.4, 40.4, 47.2, 126.6, 128.4, 128.7, 134.6, 135.4, 135.6, 142.2, 142.4, 151.8, 197.6; **HRMS (EI)** calculated for [C<sub>21</sub>H<sub>20</sub>O]<sup>+</sup> (M<sup>+</sup>): 288.1514, found 288.1512.

## 5. Reaction with phenyl-1,2-propadiene (2i)

Ethyl 4-benzylidenecyclopent-1-ene-1-carboxylate (**3u**) and ethyl 4-methylene-5-phenylcyclopent-1-ene-1-carboxylate (**3u'**). The general procedure was followed using ethyl 2-diazobut-3-enoate (**1a**, 70 mg, 0.5 mmol) and phenylallene (**2i**, 232 mg, 2.0 mmol). Final chromatographic purification (silica gel; hexanes/ethyl acetate 100:1) afforded an inseparable 4: 1 mixture of **3u** and **3u'** (69 mg, 60%).

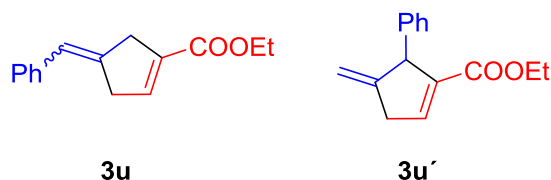

<sup>1</sup>H-NMR (*major isomer 3u*): 1.33 (t, *J* = 7.2 Hz, 3H), 3.50-3.61 (m, 4H), 4.25 (t, *J* = 7.2 Hz, 2H), 6.44-6.46 (m, 1H), 6.87-6.89 (m, 1H), 7.17-7.38 (m, 5H); (*minor isomer 3u'*, only clearly assignable signals are listed): 1.14 (t, *J* = 7.2 Hz, 3H), 3.36-3.41 (m, 2H), 4.00-4.13 (m, 2H), 4.62 (br s, 1H), 4.89 (br s, 1H), 5.08-5.10 (m, 1H), 7.02 (br s, 1H); <sup>13</sup>C-NMR (*major isomer 3u*): 14.3, 37.1, 42.2, 60.4, 123.9, 126.4, 127.5, 128.0, 128.4, 135.7, 137.5, 139.9, 141.2, 141.5, 142.3, 164.7; (*minor isomer 3u'*, only clearly assignable signals are listed): 14.0, 39.1, 55.2, 60.1, 110.5, 142.3, 143.8, 152.0, 164.2; HRMS (EI) calculated for [C<sub>15</sub>H<sub>16</sub>O<sub>2</sub>]<sup>+</sup> (M<sup>+</sup>): 228.1150, found 228.1148.

**6. General procedure for the synthesis of triene derivatives 4a-c from vinyldiazo compounds 1a-c and tetramethylallene (2j)**

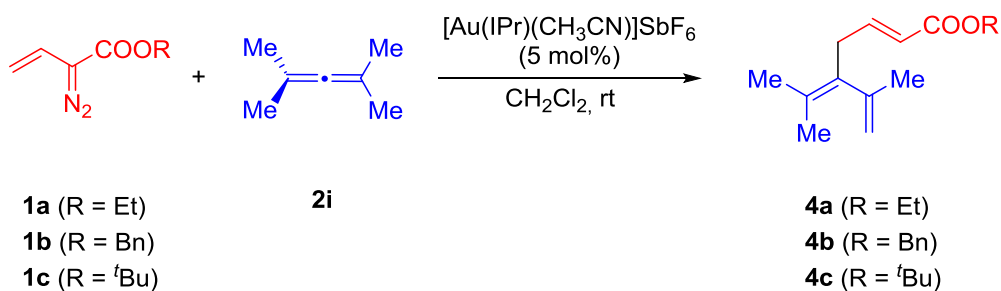

$[\text{Au}(\text{IPr})(\text{CH}_3\text{CN})]\text{SbF}_6$  (21.6 mg, 0.025 mmol, 5 mol%) was added to a solution of vinyldiazo compound **1** (0.5 mmol) and 2,4-dimethylpenta-2,3-diene (**2j**, 192 mg, 2 mmol) in  $\text{CH}_2\text{Cl}_2$  (5 mL). The mixture was stirred at room temperature until the disappearance of the starting diazo compound (monitored by TLC: 4-12 h). The solvent was removed under reduced pressure and the resulting residue was purified by flash chromatography (silica gel; hexanes/ethyl acetate 20:1) to afford triene derivatives **4a-c**.

## 7. Characterization Data of Compounds 4

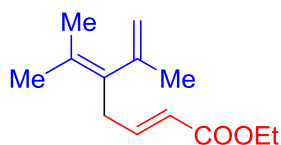

**4a**

**Ethyl (*E*)-6-methyl-5-(prop-1-en-2-yl)hepta-2,5-dienoate (4a).** The general procedure was followed using ethyl 2-diazobut-3-enoate (**1a**, 70 mg, 0.5 mmol). Final chromatographic purification afforded compound **4a** (86 mg, 83%) as a colorless oil.

**<sup>1</sup>H-NMR:** 1.29 (t, *J* = 7.2 Hz, 3H), 1.68 (s, 3H), 1.72 (s, 3H), 1.76 (s, 3H), 2.99 (d, *J* = 6.6 Hz, 2H), 4.18 (q, *J* = 7.2 Hz, 2H), 4.61 (br s, 1H), 4.94 (br s, 1H), 5.79 (dt, *J* = 15.6 and 1.5 Hz, 1H), 6.90 (dt, *J* = 15.6 and 6.6 Hz, 1H); **<sup>13</sup>C-NMR:** 14.6, 20.2, 22.1, 22.9, 35.0, 60.5, 114.3, 121.6, 128.9, 132.3, 146.3, 147.2, 167.2; **HRMS** (EI) calculated for [C<sub>13</sub>H<sub>20</sub>O<sub>2</sub>]<sup>+</sup> (M<sup>+</sup>): 208.1463, found 208.1467.

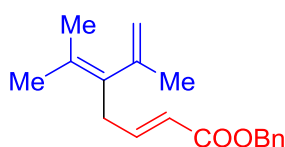

**4b**

**Benzyl (*E*)-6-methyl-5-(prop-1-en-2-yl)hepta-2,5-dienoate (4b).** The general procedure was followed using benzyl 2-diazobut-3-enoate (**1b**, 101 mg, 0.5 mmol). Final chromatographic purification afforded compound **4b** (78 mg, 58%) as a colorless oil.

**<sup>1</sup>H-NMR:** 1.69 (s, 3H), 1.73 (s, 3H), 1.78 (s, 3H), 3.01 (d, *J* = 6.6 Hz, 2H), 4.63 (br s, 1H), 4.96 (br s, 1H), 5.20 (s, 2H), 5.87 (dt, *J* = 15.6 and 1.6 Hz, 1H), 6.98 (dt, *J* = 15.6 and 6.6 Hz, 1H), 7.36-7.41 (m, 5H); **<sup>13</sup>C-NMR:** 19.9, 21.8, 22.6, 34.6, 66.0, 114.0, 120.9, 128.2, 128.6, 131.8, 136.2, 145.8, 147.6, 166.6; **HRMS** (EI) calculated for [C<sub>18</sub>H<sub>22</sub>O<sub>2</sub>]<sup>+</sup> (M<sup>+</sup>): 270.1620, found 270.1617.

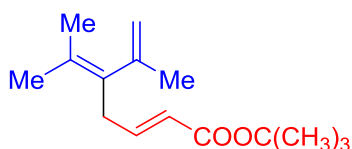

**4c**



***tert*-Butyl (*E*)-6-methyl-5-(prop-1-en-2-yl)hepta-2,5-dienoate (4c).** The general procedure was followed using *tert*-butyl 2-diazobut-3-enoate (**1c**, 84 mg, 0.5 mmol). Final chromatographic purification afforded compound **4c** (71 mg, 60%) as a colorless oil.

**<sup>1</sup>H-NMR:** 1.49 (s, 9H), 1.68 (s, 3H), 1.72 (s, 3H), 1.76 (s, 3H), 2.96 (d, *J* = 6.6 Hz, 2H), 4.61-4.62 (m, 1H), 4.94-4.95 (m, 1H), 5.71 (dt, *J* = 15.6 and 1.6 Hz, 1H), 6.80 (dt, *J* = 15.6 and 6.6 Hz, 1H);

**<sup>13</sup>C-NMR:** 19.8, 21.8, 22.6, 28.2, 34.4, 80.0, 113.8, 122.9, 128.3, 132.1, 145.6, 145.9, 166.3;

**HRMS (EI)** calculated for [C<sub>15</sub>H<sub>24</sub>O<sub>2</sub>]<sup>+</sup> (M<sup>+</sup>): 236.1776, found 236.1778.

## 8. Reaction with cyclohexyl-1,2-propadiene (2k)

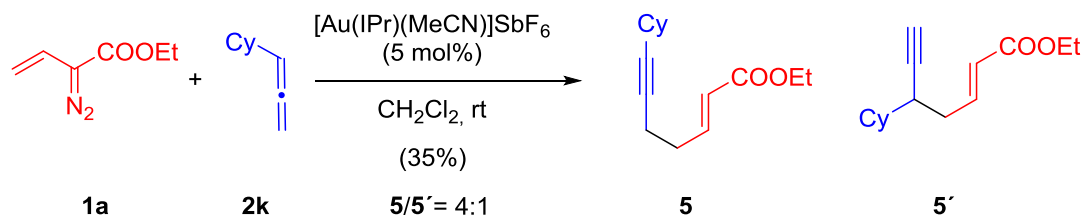

$[\text{Au}(\text{IPr})(\text{CH}_3\text{CN})]\text{SbF}_6$  (21.6 mg, 0.025 mmol, 5 mol%) was added to a solution of ethyl diazoacetate (**1a**, 70 mg, 0.5 mmol) and cyclohexylpropa-1,2-diene (**2k**, 244 mg, 2 mmol) in  $\text{CH}_2\text{Cl}_2$  (5 mL). The mixture was stirred at room temperature until the disappearance of the starting diazo compound (monitored by TLC: 8 h). The solvent was removed under reduced pressure and the resulting residue was purified by flash chromatography (silica gel; hexanes/ethyl acetate 40:1) to afford a 4:1 mixture (GC/MS) of **5** and **5'** (41 mg, 35%).

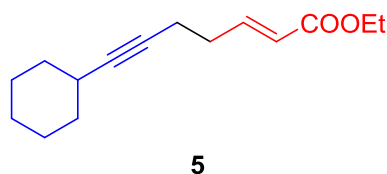

**Ethyl (E)-7-cyclohexylhept-2-en-6-ynoate (5).**  $^1\text{H-NMR}$ : 1.22-1.50 (m + t, 9H), 1.60-1.79 (m, 4H), 2.31-2.44 (m, 5H), 4.21 (q,  $J = 7.2$  Hz, 2H), 5.89 (d,  $J = 15.0$  Hz, 1H), 7.00 (dt,  $J = 15.0$  and 2.0 Hz, 1H);  $^{13}\text{C-NMR}$ : 14.3, 17.8, 24.8, 25.9, 29.0, 31.9, 33.0, 60.2, 78.3, 86.0, 122.2, 147.2, 166.5; **HRMS** (EI) calculated for  $[\text{C}_{15}\text{H}_{22}\text{O}_2]^+$  ( $\text{M}^+$ ): 234.1620, found 234.1624. NMR spectroscopic data of compound **5** match those reported in the literature (G. A. Molander, W. H. Retsch, *J. Org. Chem.* **1998**, *63*, 5507).

An experiment performed with the deuteriated allene [**D**]-**2k** afforded the following result:

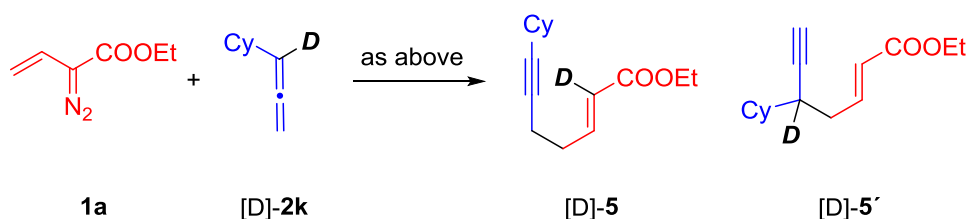

## 9. Computational study

Preliminary Density-functional theory calculations on the reaction mechanism of the gold-catalyzed reaction of unbiased allenes and vinyl diazo derivatives, using the hybrid B3LYP functional, have been carried out. The 6-31G(d) basis set was employed for all elements, with the exception of gold which has been described with the LANL2DZ basis set and pseudopotential. The stationary points located were fully optimized and characterized to be a minimum or a first-order saddle point (transition structure) by computing the harmonic vibrational frequencies. The connection of either, the reactants or products, with the corresponding transition structure was established by computation of the intrinsic reaction coordinate (IRC).<sup>5</sup> All the calculations described in this work were carried out with Gaussian09 package.<sup>6</sup>

The geometries of ethyl 2-diazo-3-butenoate (**1a**) and dimethyl (**2a**)- or cyclohexylallene (**2k**) as reactants and the gold (I)-NHC-carbene complex (**A**), as catalyst are shown in Figure S2.

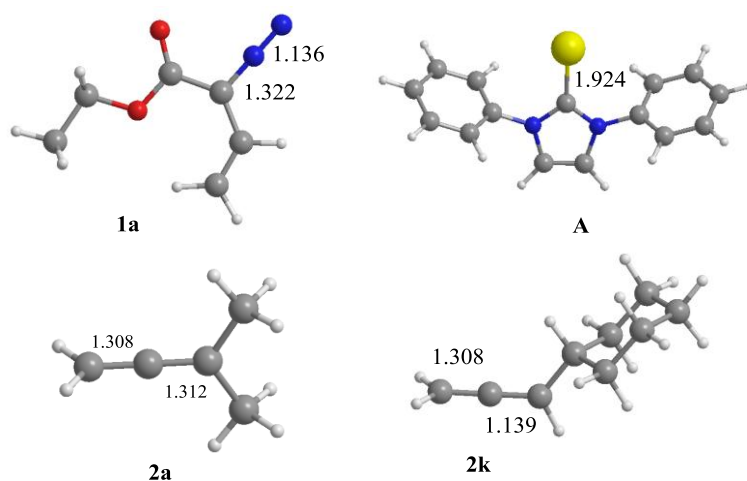

**Figure S2.** Selected bond lengths (Å) for reactants and gold (I) catalyst.

First, the coordination of allenes and the gold catalyst was studied. The complexes between the catalyst **A** and the allenes **2a** and **2k** were characterized, and in both cases, the complexation to the external or the internal double bond was considered (Figure S3).

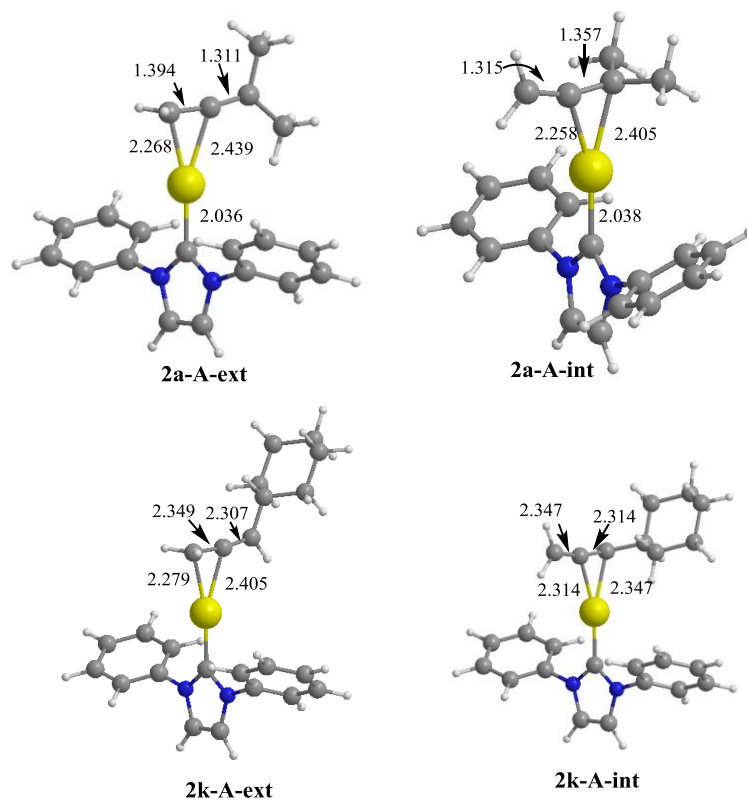

**Figure S3.** Selected bond lengths (Å) for the complexes formed between the NHC-gold carbene (**A**) and allenes **2a** and **2k**.

The coordination of the allenes to the catalyst is predicted to happen without activation barrier, and the complexation free-energies,  $\Delta G$  are collected in Table S2.

Table S2.

| Complex         | $\Delta G$ (kcal mol <sup>-1</sup> )* |
|-----------------|---------------------------------------|
| <b>2a-A-ext</b> | -23.5                                 |
| <b>2a-A-int</b> | -21.3                                 |
| <b>2k-A-ext</b> | -22.4                                 |
| <b>2k-A-int</b> | -20.1                                 |

\* Relative to the free reactants.

The data shown in Table S2 indicates that the coordination of gold catalyst to the external double bond of the allene is favoured, which can be understood on steric grounds, the internal position being more sterically crowded than the external one. The most salient geometrical features of these complexes are the increase (relative to the free cumulene) of the length of the double bond complexed to gold, and the slight bending of the C-C-C moiety in the case of the complexes involving the internal double bond.

On the other hand, the reaction of diazoester derivative **1a** with the gold (I)-NHC-carbene complex, **A**, involves a barrierless coordination of gold to the diazo-carbon atom leading to the intermediate **I** (Figure S4). The diazo-carbon atom in **I** is slightly pyramidalized and its distance to the nitrogen of the diazo group has increased, as compared with the diazoester **1a**.

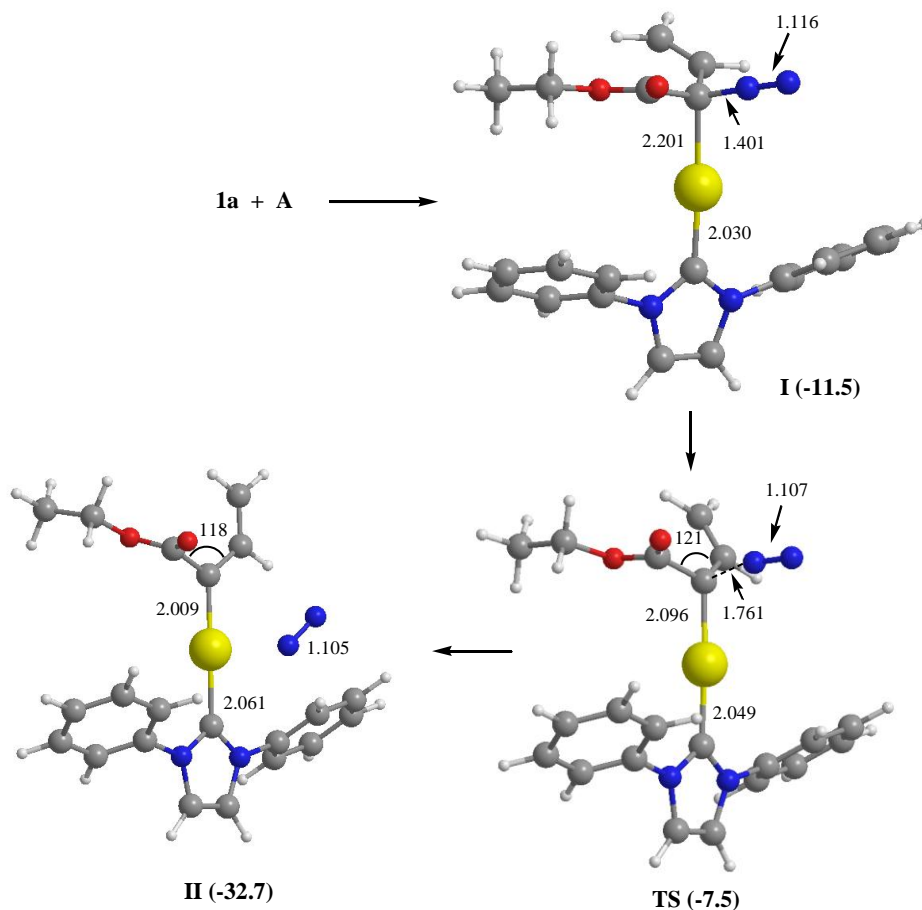

**Figure S4.** Stationary points located for the reaction of diazoester **1a** with NHC-gold carbene **A**. Selected bond lengths (Å), bond angles (degrees) and relative Gibbs free-energies (kcal mol<sup>-1</sup>) are shown.

A transition state (**TS**), corresponding to the loss of dinitrogen from intermediate **I** was found, and leads to the NHC-gold(I) carbene intermediate **II**. As could be expected, the normal mode associated with the imaginary frequency of **TS**, corresponds to the stretching of the bond between the diazo carbon atom and one of the nitrogen atoms. The gold-carbene intermediate **II** shows a length of 2.009 Å between the gold atom and the carbon atom coming from the reactant **1a**. In addition, the C-C-C angle in intermediate **II** is very close to the value corresponding to the sp<sup>2</sup> hybridization.

The dinitrogen molecule is almost fully formed in the transition structure, and the loss of the very stable N<sub>2</sub> molecule can be seen as the driving force of the reaction, with a predicted value for the reaction free-energy of 32.7 kcal mol<sup>-1</sup>.

According to these data, the key step in the catalytic cycle is the activation of the diazocompound derivative **1a** by the NHC-gold complex **A**: this process is very favoured thermodynamically, and leads to the formation of the gold carbene derivative **II**, an electrophilic intermediate which could easily react with the allene component.

**Cartesian Coordinates and Gibbs free-Energies (au) of the Stationary Points.**

| <b>1a</b>            |         |         |         | <b>2a</b>            |         |         |         | <b>2a-A-ext</b> |         |         |         |
|----------------------|---------|---------|---------|----------------------|---------|---------|---------|-----------------|---------|---------|---------|
| C                    | -0.9457 | 1.7103  | 0.0001  | C                    | 0.8729  | -0.0000 | 0.0001  | C               | -1.7550 | 2.9043  | 0.4808  |
| C                    | -1.9176 | 0.7875  | 0.0002  | C                    | -0.4388 | -0.0001 | 0.0001  | C               | -1.1020 | 2.4238  | -0.5497 |
| C                    | -1.7844 | -0.6696 | 0.0002  | C                    | -1.7469 | -0.0001 | 0.0001  | C               | -0.0690 | -3.9759 | 0.3932  |
| N                    | -2.9096 | -1.3638 | 0.0003  | C                    | 1.6688  | -1.2889 | 0.0000  | C               | -0.4643 | 2.1363  | -1.7031 |
| C                    | -0.5980 | -1.5461 | 0.0002  | C                    | 1.6685  | 1.2891  | 0.0001  | C               | -2.0996 | 2.1269  | 1.7281  |
| H                    | -2.9531 | 1.1252  | 0.0001  | H                    | -2.3213 | 0.0001  | -0.9257 | H               | 0.5813  | 2.4146  | -1.8446 |
| H                    | -1.2108 | 2.7626  | 0.0001  | H                    | 1.0177  | -2.1669 | -0.0006 | C               | 1.2529  | -3.6681 | 0.4411  |
| H                    | 0.1057  | 1.4557  | 0.0001  | H                    | 2.3206  | -1.3417 | 0.8829  | C               | -2.2061 | 4.3545  | 0.4318  |
| N                    | -3.8760 | -1.9617 | 0.0001  | H                    | 2.3215  | -1.3411 | -0.8822 | H               | -1.7601 | 1.0894  | 1.6832  |
| O                    | -0.6551 | -2.7626 | 0.0000  | H                    | 2.3207  | 1.3418  | -0.8824 | H               | -3.1856 | 2.1328  | 1.8800  |
| O                    | 0.5517  | -0.8406 | 0.0003  | H                    | 2.3207  | 1.3419  | 0.8826  | N               | -0.7404 | -2.8121 | 0.0434  |
| C                    | 1.7643  | -1.6332 | 0.0003  | H                    | 1.0171  | 2.1669  | 0.0000  | H               | -1.6467 | 2.6081  | 2.6035  |
| C                    | 2.9364  | -0.6707 | 0.0001  | H                    | -2.3215 | -0.0002 | 0.9257  | H               | -1.7697 | 4.9053  | 1.2736  |
| H                    | 1.7602  | -2.2792 | -0.8830 |                      |         |         |         | H               | -3.2968 | 4.4051  | 0.5328  |
| H                    | 1.7604  | -2.2790 | 0.8837  | <b>G=-195.210490</b> |         |         |         | N               | 1.3637  | -2.3207 | 0.1262  |
| H                    | 2.9193  | -0.0309 | 0.8884  |                      |         |         |         | H               | -1.9177 | 4.8508  | -0.4973 |
| H                    | 2.9192  | -0.0312 | -0.8884 |                      |         |         |         | H               | -1.0292 | 1.8902  | -2.6035 |
| H                    | 3.8760  | -1.2337 | 0.0001  |                      |         |         |         | Au              | -0.2742 | 0.1319  | -0.6585 |
| <b>G=-493.240241</b> |         |         |         |                      |         |         |         | C               | 0.1380  | -1.7882 | -0.1205 |
|                      |         |         |         |                      |         |         |         | C               | -2.1699 | -2.7296 | -0.1215 |
|                      |         |         |         |                      |         |         |         | C               | 2.6165  | -1.6094 | 0.0711  |
|                      |         |         |         |                      |         |         |         | H               | -0.5907 | -4.9053 | 0.5584  |
| <b>2j</b>            |         |         |         | <b>A</b>             |         |         |         | H               | 2.1162  | -4.2690 | 0.6797  |
| C                    | -1.2267 | -0.0001 | 0.5161  | C                    | 0.6796  | 1.6371  | 0.2480  | C               | -2.9935 | -3.0115 | 0.9702  |
| C                    | -2.3951 | -0.0001 | -0.0733 | C                    | -0.6796 | 1.6371  | 0.2480  | C               | -4.3784 | -2.9561 | 0.8076  |
| C                    | -3.5580 | 0.0000  | -0.6726 | N                    | 1.0882  | 0.3185  | 0.0952  | C               | -4.9272 | -2.6183 | -0.4318 |
| H                    | -4.0674 | 0.9264  | -0.9334 | N                    | -1.0882 | 0.3185  | 0.0952  | C               | -4.0919 | -2.3413 | -1.5166 |
| H                    | -4.0674 | -0.9263 | -0.9335 | C                    | -0.0000 | -0.4791 | -0.0070 | C               | -2.7053 | -2.4023 | -1.3692 |
| C                    | 0.1120  | -0.0001 | -0.1964 | C                    | 2.4670  | -0.1080 | 0.0381  |                 |         |         |         |

|                      |         |         |         |                      |         |         |         |                       |         |         |         |
|----------------------|---------|---------|---------|----------------------|---------|---------|---------|-----------------------|---------|---------|---------|
| H                    | -1.1897 | -0.0002 | 1.6084  | C                    | -2.4670 | -0.1080 | 0.0381  | H                     | -2.5558 | -3.2599 | 1.9326  |
| C                    | 0.9230  | 1.2683  | 0.1502  | Au                   | -0.0000 | -2.4377 | -0.3227 | H                     | -5.0262 | -3.1735 | 1.6513  |
| C                    | 2.3076  | 1.2669  | -0.5169 | H                    | 1.3927  | 2.4377  | 0.3666  | H                     | -6.0053 | -2.5775 | -0.5539 |
| C                    | 3.1022  | 0.0000  | -0.1680 | H                    | -1.3926 | 2.4377  | 0.3666  | H                     | -4.5174 | -2.0929 | -2.4841 |
| C                    | 2.3077  | -1.2669 | -0.5170 | C                    | 2.9729  | -0.9361 | 1.0427  | H                     | -2.0462 | -2.2201 | -2.2123 |
| C                    | 0.9231  | -1.2684 | 0.1502  | C                    | 4.3108  | -1.3296 | 0.9808  | C                     | 3.5829  | -2.0150 | -0.8514 |
| H                    | -0.0768 | -0.0001 | -1.2790 | C                    | 5.1255  | -0.8874 | -0.0642 | C                     | 4.8059  | -1.3442 | -0.8915 |
| H                    | 1.0453  | 1.3241  | 1.2429  | C                    | 4.6064  | -0.0504 | -1.0553 | C                     | 5.0521  | -0.2797 | -0.0210 |
| H                    | 0.3552  | 2.1593  | -0.1452 | C                    | 3.2688  | 0.3441  | -1.0113 | C                     | 4.0771  | 0.1146  | 0.8984  |
| H                    | 2.8672  | 2.1631  | -0.2195 | H                    | 2.3387  | -1.2454 | 1.8678  | C                     | 2.8530  | -0.5538 | 0.9542  |
| H                    | 2.1827  | 1.3261  | -1.6083 | H                    | 4.7172  | -1.9695 | 1.7578  | H                     | 3.3750  | -2.8342 | -1.5333 |
| H                    | 3.3292  | -0.0000 | 0.9086  | H                    | 6.1669  | -1.1915 | -0.1040 | H                     | 5.5625  | -1.6516 | -1.6067 |
| H                    | 4.0674  | 0.0000  | -0.6905 | H                    | 5.2392  | 0.2926  | -1.8678 | H                     | 6.0053  | 0.2389  | -0.0558 |
| H                    | 2.8673  | -2.1631 | -0.2196 | H                    | 2.8505  | 0.9816  | -1.7845 | H                     | 4.2725  | 0.9333  | 1.5842  |
| H                    | 2.1828  | -1.3261 | -1.6084 | C                    | -3.2687 | 0.3440  | -1.0113 | H                     | 2.0982  | -0.2763 | 1.6832  |
| H                    | 0.3553  | -2.1594 | -0.1452 | C                    | -4.6064 | -0.0505 | -1.0554 |                       |         |         |         |
| H                    | 1.0454  | -1.3242 | 1.2428  | C                    | -5.1255 | -0.8874 | -0.0642 | <b>G=-1018.617312</b> |         |         |         |
|                      |         |         |         | C                    | -4.3108 | -1.3295 | 0.9808  |                       |         |         |         |
| <b>G=-351.167050</b> |         |         |         | C                    | -2.9730 | -0.9360 | 1.0428  |                       |         |         |         |
|                      |         |         |         | H                    | -2.8504 | 0.9815  | -1.7846 |                       |         |         |         |
|                      |         |         |         | H                    | -5.2392 | 0.2924  | -1.8679 |                       |         |         |         |
|                      |         |         |         | H                    | -6.1669 | -1.1915 | -0.1041 |                       |         |         |         |
|                      |         |         |         | H                    | -4.7173 | -1.9693 | 1.7579  |                       |         |         |         |
|                      |         |         |         | H                    | -2.3387 | -1.2453 | 1.8679  |                       |         |         |         |
|                      |         |         |         | <b>G=-823.369308</b> |         |         |         |                       |         |         |         |



| 2a-A-int |         |         |         | 2k-A-ext |         |         |         | 2k-A-int |         |         |         |
|----------|---------|---------|---------|----------|---------|---------|---------|----------|---------|---------|---------|
| C        | -0.0002 | 2.9689  | -0.7781 | C        | -1.3231 | -0.5395 | 0.7978  | C        | -0.6678 | -2.3506 | -0.4458 |
| C        | -0.0001 | 2.6452  | 0.5397  | C        | -0.5109 | -0.6037 | 1.8203  | C        | -0.2739 | -2.3030 | 0.8452  |
| C        | -0.6791 | -3.5773 | -0.7673 | C        | 0.1634  | -0.6827 | 2.9861  | C        | -0.0854 | -2.4949 | 2.1289  |
| C        | -0.0002 | 2.7619  | 1.8493  | C        | 5.6013  | -0.8892 | -0.4837 | C        | 4.1044  | 2.0466  | -1.0351 |
| C        | -1.2918 | 3.2955  | -1.5055 | H        | 0.2836  | 0.1979  | 3.6176  | H        | 0.5635  | -1.8693 | 2.7331  |
| C        | 1.2915  | 3.2956  | -1.5055 | H        | 0.3580  | -1.6500 | 3.4504  | H        | -0.5886 | -3.3220 | 2.6279  |
| C        | 0.6792  | -3.5772 | -0.7673 | C        | -2.8354 | -0.6180 | 0.9245  | C        | -1.9856 | -1.8248 | -1.0009 |
| H        | -0.0003 | 3.7532  | 2.3013  | H        | -0.9206 | -0.4277 | -0.2084 | H        | -0.1082 | -3.0157 | -1.1089 |
| H        | -2.1725 | 2.9789  | -0.9435 | C        | 5.5040  | 0.4655  | -0.4741 | C        | 3.0860  | 2.9414  | -0.9500 |
| H        | -1.3140 | 2.8422  | -2.5018 | C        | -3.4888 | 0.6674  | 0.3674  | C        | -2.9034 | -3.0418 | -1.2939 |
| N        | -1.0814 | -2.2505 | -0.7042 | C        | -5.0229 | 0.5842  | 0.4305  | C        | -4.2391 | -2.5878 | -1.9058 |
| H        | -1.3381 | 4.3846  | -1.6415 | C        | -5.5530 | -0.6634 | -0.2912 | C        | -4.9492 | -1.5571 | -1.0165 |
| H        | 1.3378  | 4.3847  | -1.6414 | N        | 4.4559  | -1.3791 | 0.1284  | N        | 3.5549  | 0.7904  | -0.8200 |
| H        | 1.3136  | 2.8423  | -2.5018 | C        | -4.9018 | -1.9428 | 0.2544  | C        | -4.0364 | -0.3600 | -0.7116 |
| N        | 1.0815  | -2.2505 | -0.7042 | C        | -3.3675 | -1.8700 | 0.1896  | C        | -2.7000 | -0.8069 | -0.0973 |
| H        | 2.1722  | 2.9789  | -0.9435 | H        | -3.0918 | -0.7055 | 1.9888  | H        | -1.7635 | -1.3455 | -1.9657 |
| H        | -0.0003 | 1.9102  | 2.5213  | H        | -3.1718 | 0.8043  | -0.6773 | H        | -3.0899 | -3.5788 | -0.3532 |
| Au       | -0.0001 | 0.5936  | -0.4034 | H        | -3.1278 | 1.5403  | 0.9249  | H        | -2.3965 | -3.7451 | -1.9668 |
| C        | 0.0000  | -1.4285 | -0.6554 | N        | 4.3032  | 0.7778  | 0.1481  | N        | 1.9344  | 2.2152  | -0.6792 |
| C        | -2.4592 | -1.8296 | -0.6752 | H        | -5.4557 | 1.4928  | -0.0045 | H        | -4.8796 | -3.4627 | -2.0668 |
| C        | 2.4592  | -1.8295 | -0.6752 | H        | -5.3399 | 0.5604  | 1.4830  | H        | -4.0510 | -2.1503 | -2.8968 |
| H        | -1.3911 | -4.3847 | -0.8338 | Au       | 1.8680  | -0.4935 | 1.4850  | Au       | 0.9204  | -0.6361 | -0.2263 |
| H        | 1.3913  | -4.3846 | -0.8338 | H        | -5.3425 | -0.5786 | -1.3673 | H        | -5.2490 | -2.0355 | -0.0730 |
| C        | -3.2778 | -2.2635 | 0.3693  | C        | 3.6525  | -0.3555 | 0.5201  | C        | 2.2178  | 0.8884  | -0.5990 |
| C        | -4.6185 | -1.8770 | 0.3861  | H        | -6.6430 | -0.7227 | -0.1905 | H        | -5.8718 | -1.2152 | -1.4997 |
| C        | -5.1281 | -1.0638 | -0.6291 | C        | 4.1801  | -2.7822 | 0.3108  | C        | 4.3165  | -0.4339 | -0.8374 |
| C        | -4.2988 | -0.6387 | -1.6696 | H        | -5.2494 | -2.8193 | -0.3052 | H        | -4.5373 | 0.3385  | -0.0310 |
| C        | -2.9580 | -1.0253 | -1.7021 | C        | 3.8392  | 2.1251  | 0.3680  | C        | 0.6326  | 2.8091  | -0.5062 |
| H        | -2.8680 | -2.8830 | 1.1616  | H        | -5.2123 | -2.0955 | 1.2979  | H        | -3.8400 | 0.1956  | -1.6402 |
| H        | -5.2614 | -2.2082 | 1.1956  | H        | 6.3615  | -1.5462 | -0.8759 | H        | 5.1551  | 2.1801  | -1.2391 |
| H        | -6.1722 | -0.7665 | -0.6122 | H        | -2.9209 | -2.7735 | 0.6226  | H        | -2.0536 | 0.0642  | 0.0751  |
|          |         |         |         |          |         |         |         | H        | 3.0722  | 4.0160  | -1.0407 |

|                       |         |         |         |                       |         |         |         |                       |         |         |         |
|-----------------------|---------|---------|---------|-----------------------|---------|---------|---------|-----------------------|---------|---------|---------|
| H                     | -4.6976 | -0.0193 | -2.4672 | H                     | 6.1733  | 1.2307  | -0.8345 | H                     | -2.8829 | -1.2639 | 0.8851  |
| H                     | -2.3107 | -0.7277 | -2.5212 | H                     | -3.0471 | -1.8290 | -0.8623 | C                     | 5.3205  | -0.6191 | 0.1147  |
| C                     | 2.9580  | -1.0253 | -1.7022 | C                     | 5.0500  | -3.5460 | 1.0911  | C                     | 6.0726  | -1.7943 | 0.0872  |
| C                     | 4.2988  | -0.6386 | -1.6697 | C                     | 4.7988  | -4.9095 | 1.2498  | C                     | 5.8173  | -2.7691 | -0.8804 |
| C                     | 5.1281  | -1.0636 | -0.6291 | C                     | 3.6883  | -5.4953 | 0.6372  | C                     | 4.8117  | -2.5695 | -1.8292 |
| C                     | 4.6185  | -1.8767 | 0.3862  | C                     | 2.8271  | -4.7198 | -0.1426 | C                     | 4.0577  | -1.3950 | -1.8169 |
| C                     | 3.2778  | -2.2632 | 0.3694  | C                     | 3.0723  | -3.3567 | -0.3161 | H                     | 5.5013  | 0.1395  | 0.8705  |
| H                     | 2.3108  | -0.7278 | -2.5213 | H                     | 5.9017  | -3.0773 | 1.5750  | H                     | 6.8539  | -1.9481 | 0.8250  |
| H                     | 4.6976  | -0.0193 | -2.4673 | H                     | 5.4688  | -5.5107 | 1.8566  | H                     | 6.4053  | -3.6816 | -0.8980 |
| H                     | 6.1722  | -0.7662 | -0.6121 | H                     | 3.4972  | -6.5565 | 0.7635  | H                     | 4.6213  | -3.3208 | -2.5895 |
| H                     | 5.2614  | -2.2078 | 1.1958  | H                     | 1.9713  | -5.1767 | -0.6300 | H                     | 3.2918  | -1.2148 | -2.5648 |
| H                     | 2.8680  | -2.8826 | 1.1617  | H                     | 2.4278  | -2.7488 | -0.9431 | C                     | 0.0602  | 3.5067  | -1.5716 |
|                       |         |         |         | C                     | 3.5668  | 2.9353  | -0.7357 | C                     | -1.1891 | 4.1040  | -1.3984 |
| <b>G=-1018.613782</b> |         |         |         | C                     | 3.1422  | 4.2478  | -0.5252 | C                     | -1.8546 | 3.9987  | -0.1747 |
|                       |         |         |         | C                     | 2.9903  | 4.7369  | 0.7745  | C                     | -1.2694 | 3.3002  | 0.8842  |
|                       |         |         |         | C                     | 3.2684  | 3.9161  | 1.8700  | C                     | -0.0163 | 2.7054  | 0.7260  |
|                       |         |         |         | C                     | 3.7016  | 2.6040  | 1.6726  | H                     | 0.5804  | 3.5706  | -2.5227 |
|                       |         |         |         | H                     | 3.6763  | 2.5402  | -1.7414 | H                     | -1.6420 | 4.6475  | -2.2219 |
|                       |         |         |         | H                     | 2.9268  | 4.8848  | -1.3775 | H                     | -2.8255 | 4.4667  | -0.0442 |
|                       |         |         |         | H                     | 2.6605  | 5.7591  | 0.9334  | H                     | -1.7787 | 3.2303  | 1.8405  |
|                       |         |         |         | H                     | 3.1633  | 4.2995  | 2.8804  | H                     | 0.4618  | 2.1843  | 1.5493  |
|                       |         |         |         | H                     | 3.9494  | 1.9654  | 2.5148  |                       |         |         |         |
|                       |         |         |         |                       |         |         |         | <b>G=-1174.568440</b> |         |         |         |
|                       |         |         |         | <b>G=-1174.572117</b> |         |         |         |                       |         |         |         |

| I  |         |         |         | TS |         |         |         | II + N <sub>2</sub> |         |         |         |
|----|---------|---------|---------|----|---------|---------|---------|---------------------|---------|---------|---------|
| C  | -1.0604 | -3.2012 | 2.3523  | C  | -1.3808 | -4.1047 | 0.8473  | C                   | 1.3663  | -4.6234 | -0.5340 |
| C  | 1.2964  | 3.6450  | 0.0731  | C  | 1.4308  | 3.6692  | 0.1999  | C                   | -2.0171 | 3.2622  | -0.7206 |
| C  | -0.3469 | -3.0709 | 1.2323  | C  | -0.7317 | -3.1978 | 0.1011  | C                   | 0.5534  | -3.5326 | -0.5505 |
| C  | 2.5293  | 3.0854  | 0.1659  | C  | 2.5601  | 2.9287  | 0.3358  | C                   | -3.1148 | 2.4686  | -0.8322 |
| C  | -0.7945 | -2.4044 | -0.0470 | C  | -1.3531 | -1.9783 | -0.4560 | C                   | 1.0489  | -2.1919 | -0.5041 |
| N  | 0.3911  | 2.6012  | -0.0769 | N  | 0.4010  | 2.7824  | -0.0877 | N                   | -0.9280 | 2.4199  | -0.5570 |
| N  | -0.2748 | -3.1032 | -1.1446 | N  | -1.3756 | -2.3103 | -2.1856 | N                   | -0.0658 | -1.2903 | 3.5780  |
| N  | 2.3555  | 1.7100  | 0.0712  | N  | 2.1981  | 1.6040  | 0.1283  | N                   | -2.6728 | 1.1582  | -0.7334 |
| C  | 1.0389  | 1.4064  | -0.0680 | C  | 0.8651  | 1.5042  | -0.1228 | C                   | -1.3207 | 1.1162  | -0.5749 |
| C  | -2.2576 | -2.1166 | -0.4001 | C  | -2.8439 | -1.7187 | -0.3020 | C                   | 2.5102  | -1.9834 | -0.3313 |
| H  | 0.6789  | -3.4323 | 1.1998  | H  | 0.3400  | -3.2949 | -0.0536 | H                   | -0.5219 | -3.6757 | -0.6070 |
| C  | -1.0315 | 2.7827  | -0.2064 | C  | -0.9651 | 3.1853  | -0.2965 | C                   | 0.4261  | 2.8835  | -0.4034 |
| H  | -0.6076 | -3.6744 | 3.2177  | H  | -0.8380 | -4.9230 | 1.3113  | H                   | 0.9601  | -5.6307 | -0.5765 |
| C  | 3.4346  | 0.7577  | 0.1298  | C  | 3.1238  | 0.5029  | 0.1861  | C                   | -3.5408 | 0.0125  | -0.8015 |
| Au | 0.1911  | -0.4375 | -0.1216 | Au | -0.2261 | -0.2139 | -0.3587 | Au                  | -0.1186 | -0.5565 | -0.5106 |
| H  | -2.0743 | -2.8364 | 2.4534  | H  | -2.4419 | -4.0372 | 1.0620  | H                   | 2.4478  | -4.5379 | -0.4711 |
| N  | 0.1691  | -3.6418 | -2.0156 | N  | -1.1234 | -2.4945 | -3.2474 | N                   | 0.0896  | -0.2350 | 3.2892  |
| H  | 0.9807  | 4.6762  | 0.0696  | H  | 1.2678  | 4.7341  | 0.2488  | H                   | -1.9154 | 4.3359  | -0.7092 |
| O  | -2.7064 | -2.3039 | -1.5083 | O  | -3.6063 | -1.5686 | -1.2320 | O                   | 2.9255  | -1.8397 | 0.8033  |
| H  | 3.5077  | 3.5291  | 0.2606  | H  | 3.5815  | 3.2165  | 0.5284  | H                   | -4.1600 | 2.7123  | -0.9385 |
| O  | -2.9066 | -1.6017 | 0.6398  | O  | -3.1483 | -1.6063 | 0.9904  | O                   | 3.2081  | -1.9400 | -1.4555 |
| C  | -1.6855 | 2.3281  | -1.3538 | C  | -1.6126 | 2.8519  | -1.4884 | C                   | 1.1662  | 2.5021  | 0.7182  |
| C  | -4.3001 | -1.2174 | 0.3951  | C  | -4.5234 | -1.2009 | 1.2967  | C                   | 4.6315  | -1.5944 | -1.3374 |
| C  | -3.0621 | 2.5269  | -1.4742 | C  | -2.9332 | 3.2606  | -1.6812 | C                   | 2.4723  | 2.9743  | 0.8594  |
| C  | -4.8377 | -0.6199 | 1.6785  | C  | -4.6569 | -1.1577 | 2.8046  | C                   | 5.1960  | -1.5224 | -2.7404 |
| C  | -3.7688 | 3.1836  | -0.4635 | C  | -3.5892 | 4.0063  | -0.6991 | C                   | 3.0212  | 3.8273  | -0.1007 |
| H  | -4.8461 | -2.1120 | 0.0849  | H  | -5.2001 | -1.9240 | 0.8341  | H                   | 5.1156  | -2.3630 | -0.7291 |
| C  | -3.1008 | 3.6405  | 0.6757  | C  | -2.9264 | 4.3432  | 0.4836  | C                   | 2.2659  | 4.2083  | -1.2127 |
| H  | -4.3060 | -0.5036 | -0.4327 | H  | -4.6935 | -0.2257 | 0.8321  | H                   | 4.6989  | -0.6411 | -0.8062 |
| C  | -1.7265 | 3.4395  | 0.8113  | C  | -1.6101 | 3.9306  | 0.6928  | C                   | 0.9633  | 3.7350  | -1.3715 |
| H  | -4.2686 | 0.2693  | 1.9671  | H  | -3.9568 | -0.4397 | 3.2427  | H                   | 4.6869  | -0.7549 | -3.3311 |

|                       |         |         |         |                                  |         |         |         |                       |         |         |         |
|-----------------------|---------|---------|---------|----------------------------------|---------|---------|---------|-----------------------|---------|---------|---------|
| H                     | -1.1215 | 1.8461  | -2.1459 | H                                | -1.0826 | 2.2994  | -2.2574 | H                     | 0.7213  | 1.8657  | 1.4762  |
| H                     | -4.8039 | -1.3428 | 2.4994  | H                                | -4.4722 | -2.1413 | 3.2474  | H                     | 5.0987  | -2.4829 | -3.2555 |
| H                     | -3.5753 | 2.1860  | -2.3684 | H                                | -3.4419 | 3.0079  | -2.6064 | H                     | 3.0521  | 2.6863  | 1.7310  |
| H                     | -5.8820 | -0.3266 | 1.5282  | H                                | -5.6745 | -0.8508 | 3.0679  | H                     | 6.2598  | -1.2680 | -2.6884 |
| H                     | -4.8370 | 3.3486  | -0.5677 | H                                | -4.6133 | 4.3300  | -0.8579 | H                     | 4.0339  | 4.2000  | 0.0199  |
| H                     | -3.6473 | 4.1529  | 1.4615  | H                                | -3.4338 | 4.9230  | 1.2486  | H                     | 2.6903  | 4.8699  | -1.9616 |
| H                     | -1.2003 | 3.7773  | 1.6991  | H                                | -1.0932 | 4.1709  | 1.6172  | H                     | 0.3758  | 4.0091  | -2.2428 |
| C                     | 4.2316  | 0.7061  | 1.2749  | C                                | 3.8226  | 0.2644  | 1.3711  | C                     | -4.3546 | -0.1575 | -1.9234 |
| C                     | 5.2940  | -0.1975 | 1.3223  | C                                | 4.7427  | -0.7836 | 1.4185  | C                     | -5.2147 | -1.2548 | -1.9793 |
| C                     | 5.5495  | -1.0393 | 0.2371  | C                                | 4.9554  | -1.5836 | 0.2931  | C                     | -5.2542 | -2.1715 | -0.9259 |
| C                     | 4.7454  | -0.9764 | -0.9036 | C                                | 4.2507  | -1.3342 | -0.8870 | C                     | -4.4360 | -1.9897 | 0.1916  |
| C                     | 3.6847  | -0.0712 | -0.9662 | C                                | 3.3336  | -0.2837 | -0.9489 | C                     | -3.5777 | -0.8913 | 0.2630  |
| H                     | 4.0149  | 1.3546  | 2.1186  | H                                | 3.6388  | 0.8829  | 2.2446  | H                     | -4.3034 | 0.5503  | -2.7454 |
| H                     | 5.9179  | -0.2450 | 2.2095  | H                                | 5.2891  | -0.9758 | 2.3367  | H                     | -5.8490 | -1.3943 | -2.8492 |
| H                     | 6.3788  | -1.7390 | 0.2777  | H                                | 5.6745  | -2.3961 | 0.3340  | H                     | -5.9270 | -3.0225 | -0.9731 |
| H                     | 4.9527  | -1.6190 | -1.7539 | H                                | 4.4265  | -1.9449 | -1.7674 | H                     | -4.4773 | -2.6917 | 1.0190  |
| H                     | 3.0707  | 0.0095  | -1.8577 | H                                | 2.8027  | -0.0585 | -1.8685 | H                     | -2.9608 | -0.7215 | 1.1396  |
| <b>G=-1316.628004</b> |         |         |         | <b>G=-1316.621563</b>            |         |         |         | <b>G=-1316.661061</b> |         |         |         |
|                       |         |         |         | $\nu_i=-340.48i \text{ cm}^{-1}$ |         |         |         |                       |         |         |         |

## 10. References

1. a) A. Padwa, Y. S. Kulkarni and Z. Zhang, *J. Org. Chem.* 1990, **55**, 4144; b) H. M. L. Davies, P. W. Hougland and W. R. Cantrell Jr., *Synth. Commun.* 1992, **22**, 971; c) M. P. Doyle, M. Yan, W. Hu and L. Gronenberg, *L. J. Am. Chem. Soc.* 2003, **125**, 4692; d) C. Peng, J. Cheng, and J. Wang, *J. Am. Chem. Soc.* 2007, **129**, 8708.
2. a) M. S. Baird, A. V. Nizoutsev and I. G. Bolesov, *Tetrahedron*, 2002, **58**, 1581; b) T. Jiro, S. Teuro and M. Ichiro, *Synthesis*, 1987, 603.
3. J.-L. Moreau and M. Gaudemar, *J. Organomet. Chem.* 1976, **108**, 159.
4. P. de Frémont, N. Marion and S. P. Nolan, *J. Organomet. Chem.* 2009, **694**, 551.
5. For a detailed presentation of the theoretical methods, see: F. Jensen, *Introduction to Computational Chemistry*, 2<sup>nd</sup> edition, Wiley **2007**.
6. *Gaussian 09*, Revision B.01, Frisch, M. J.; Trucks, G. W.; Schlegel, H. B.; Scuseria, G. E.; Robb, M. A.; Cheeseman, J. R.; Scalmani, G.; Barone, V.; Mennucci, B.; Petersson, G. A.; Nakatsuji, H.; Caricato, M.; Li, X.; Hratchian, H. P.; Izmaylov, A. F.; Bloino, J.; Zheng, G.; Sonnenberg, J. L.; Hada, M.; Ehara, M.; Toyota, K.; Fukuda, R.; Hasegawa, J.; Ishida, M.; Nakajima, T.; Honda, Y.; Kitao, O.; Nakai, H.; Vreven, T.; Montgomery, J. A. Jr.; Peralta, J. E.; Ogliaro, F.; Bearpark, M.; Heyd, J. J.; Brothers, E.; Kudin, K. N.; Staroverov, V. N.; Keith, T.; Kobayashi, R.; Normand, J.; Raghavachari, K.; Rendell, A. J.; Burant, C.; Iyengar, S. S.; Tomasi, J.; Cossi, M.; Rega, N.; Millam, J. M.; Klene, M.; Knox, J. E.; Cross, J. B.; Bakken, V.; Adamo, C.; Jaramillo, J.; Gomperts, R.; Stratmann, R. E.; Yazyev, O.; Austin, A. J.; Cammi, R.; Pomelli, C.; Ochterski, J. W.; Martin, R. L.; Morokuma, K.; Zakrzewski, V. G.; Voth, G. A.; Salvador, P.; Dannenberg, J. J.; Dapprich, S.; Daniels, A. D.; Farkas, O.; Foresman, J. B.; Ortiz, J. V.; Cioslowski, J. and Fox, D. J. Gaussian, Inc., Wallingford CT, 2010.

# 11. <sup>1</sup>H- and <sup>13</sup>C-NMR spectra for new compounds

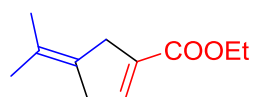

3a

EL-155car

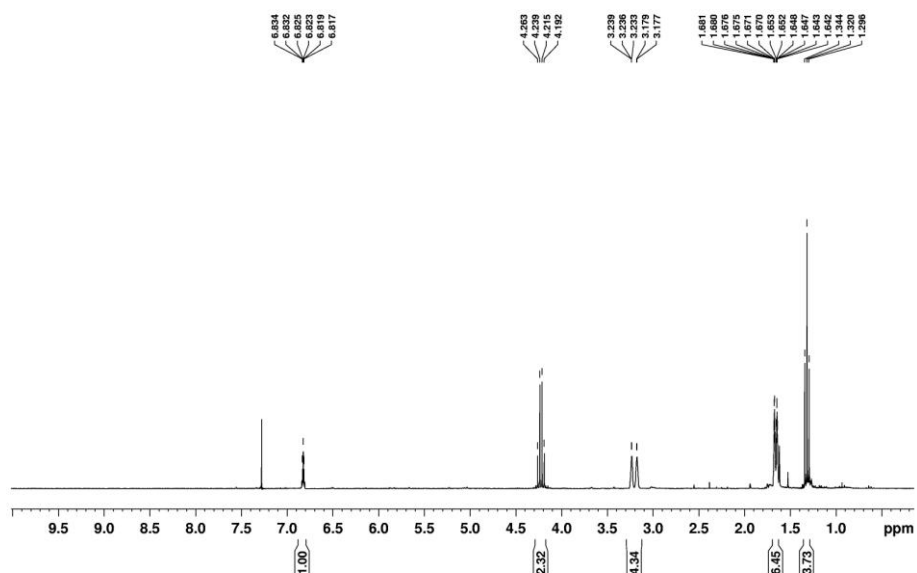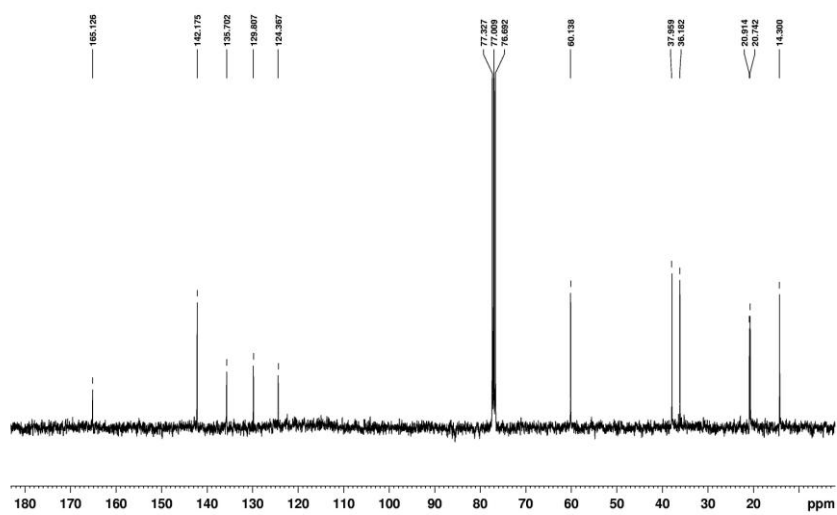

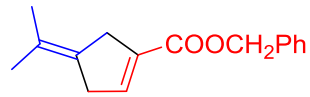

**3b**

EL-262

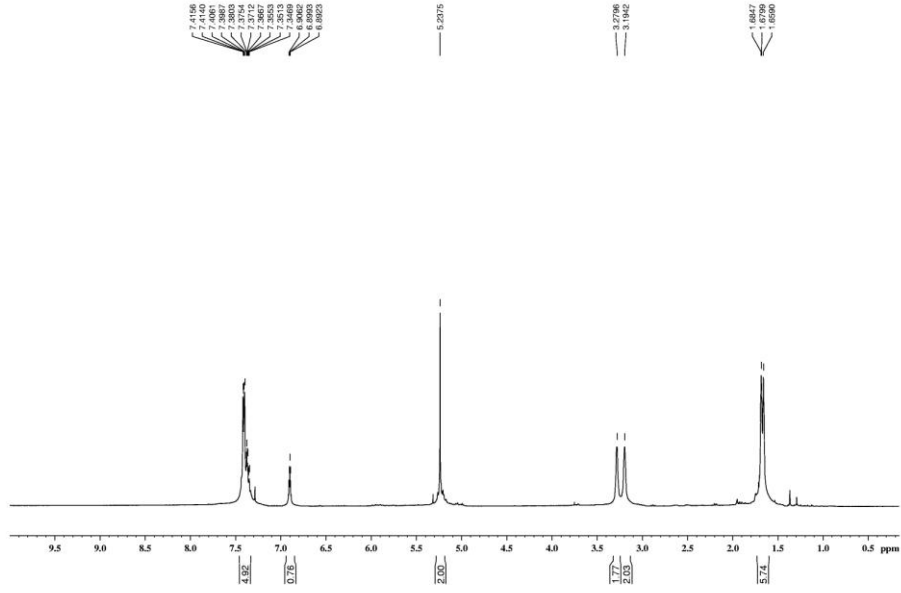

EL-262

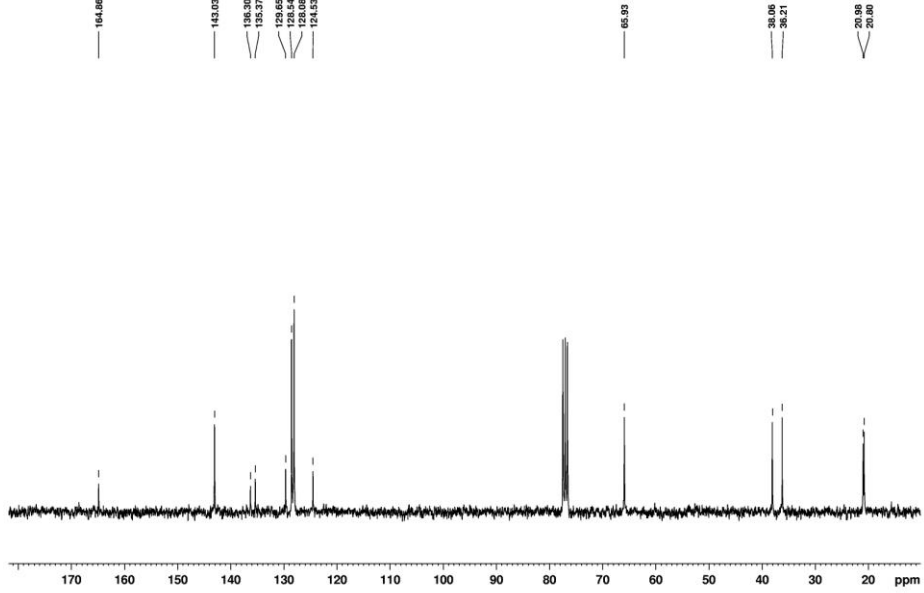

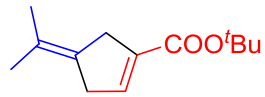

3c

EL-260f1

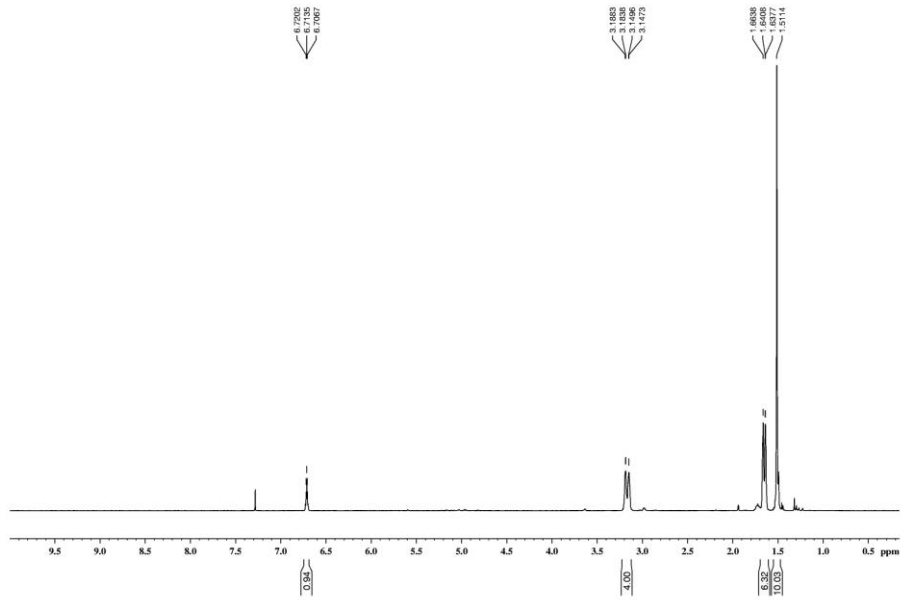

EL-260f1

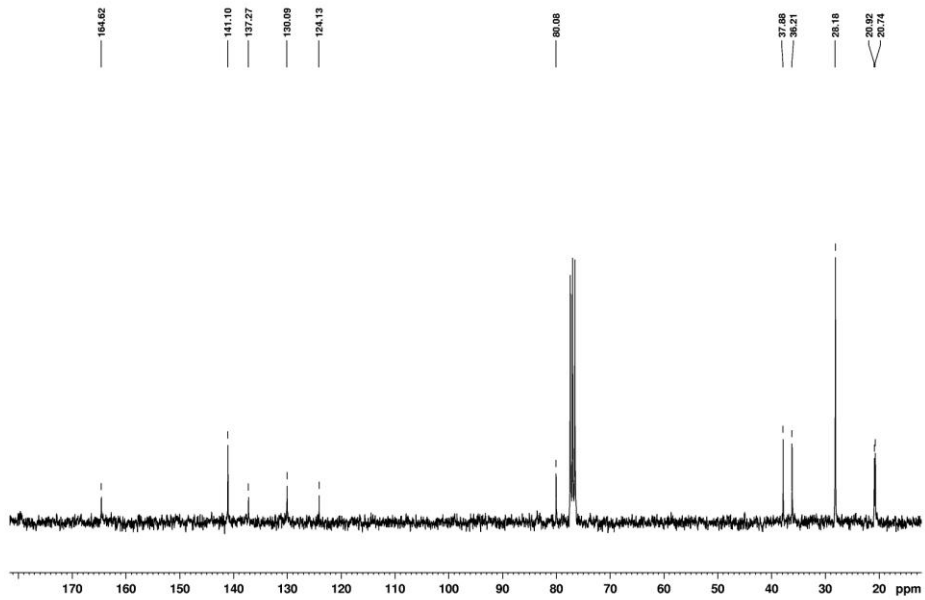



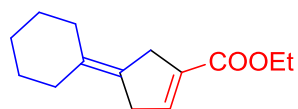

3d

EL-279f2p

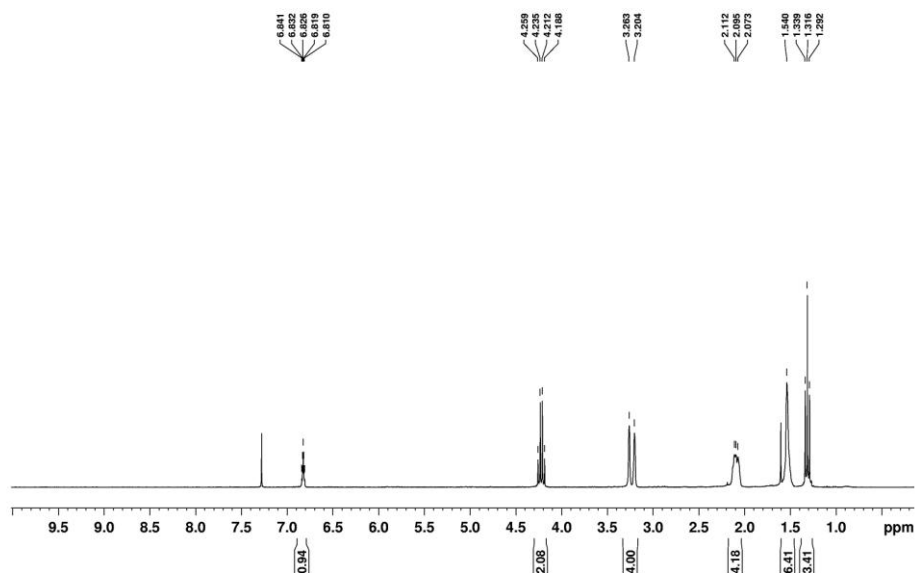

EL-279f2

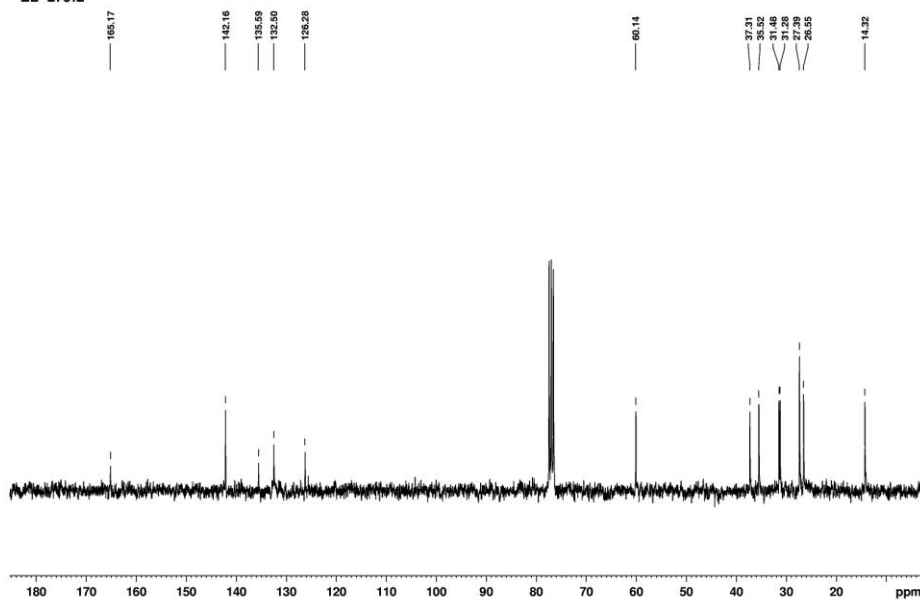

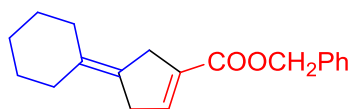

3e

EL-25112

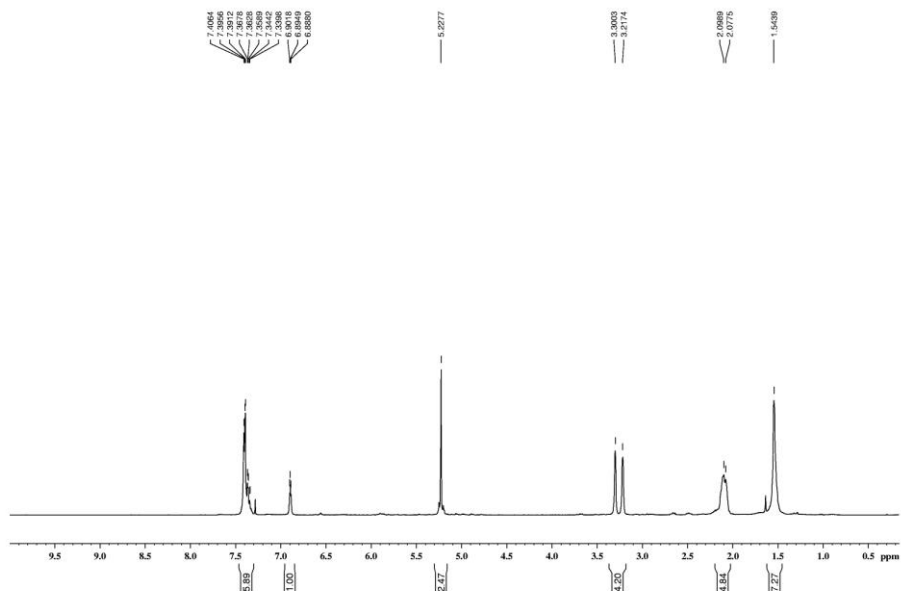

EL-25112

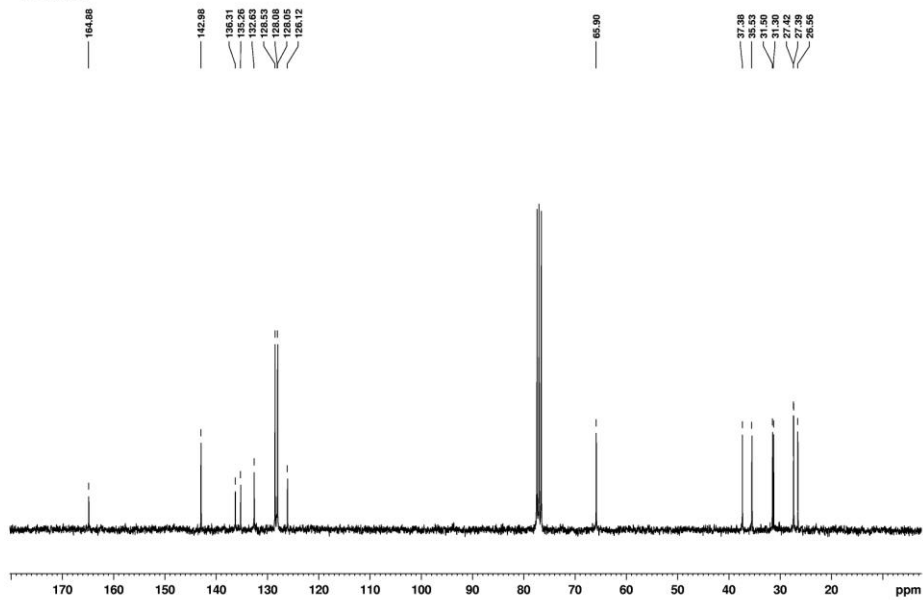

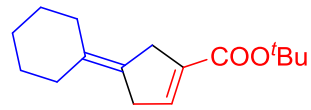

3f

EL-250f2

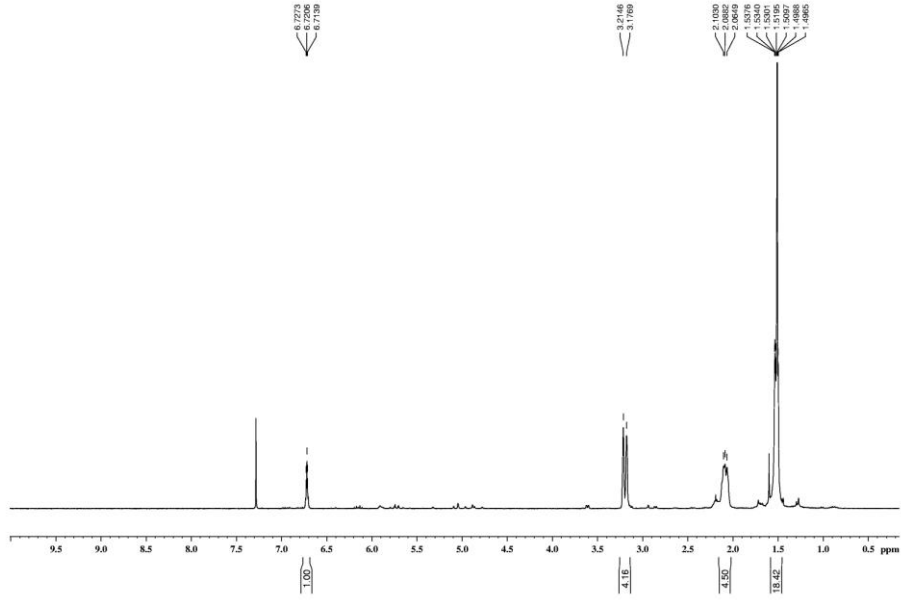

EL-250f2car

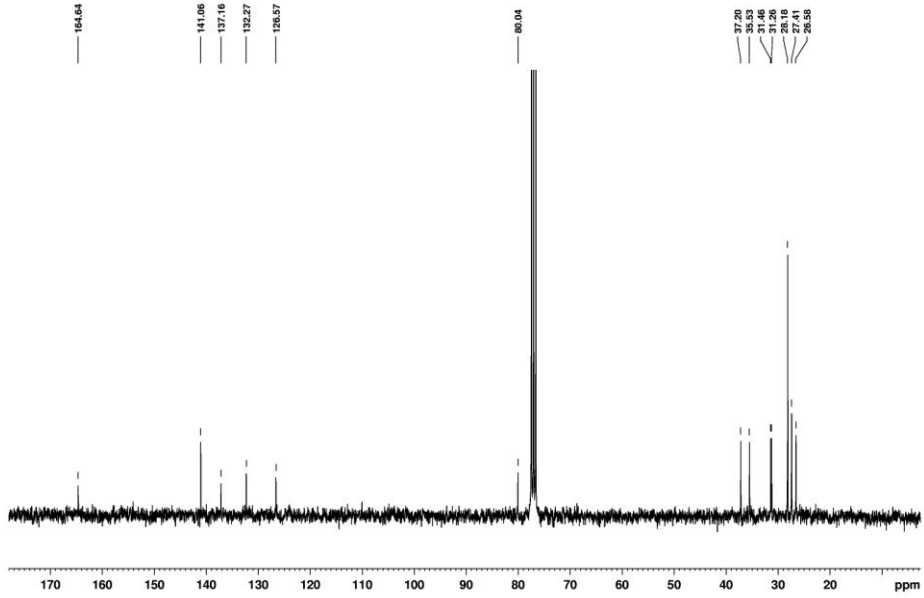

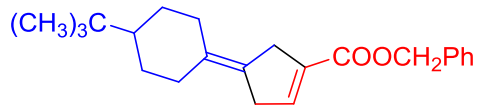

3g

EL-356f3\_1h

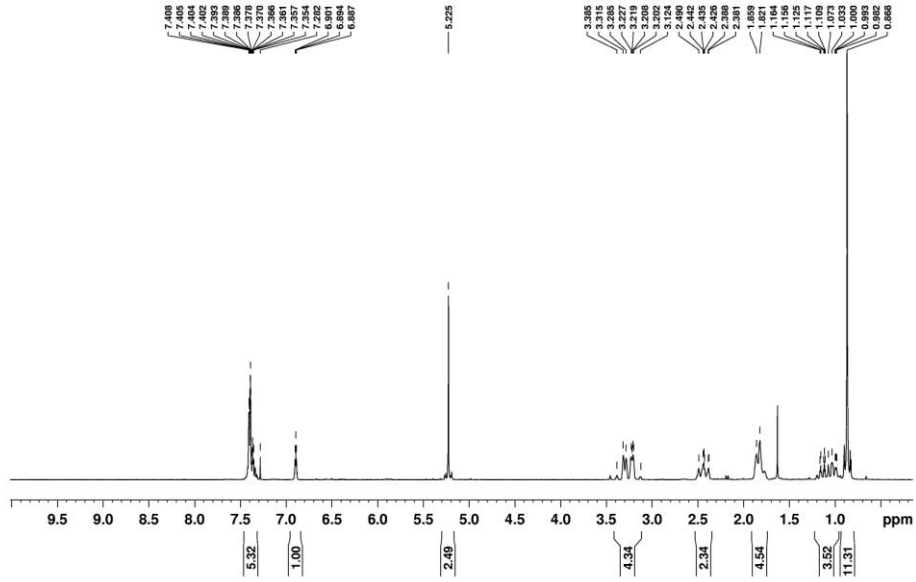

EL-356f2

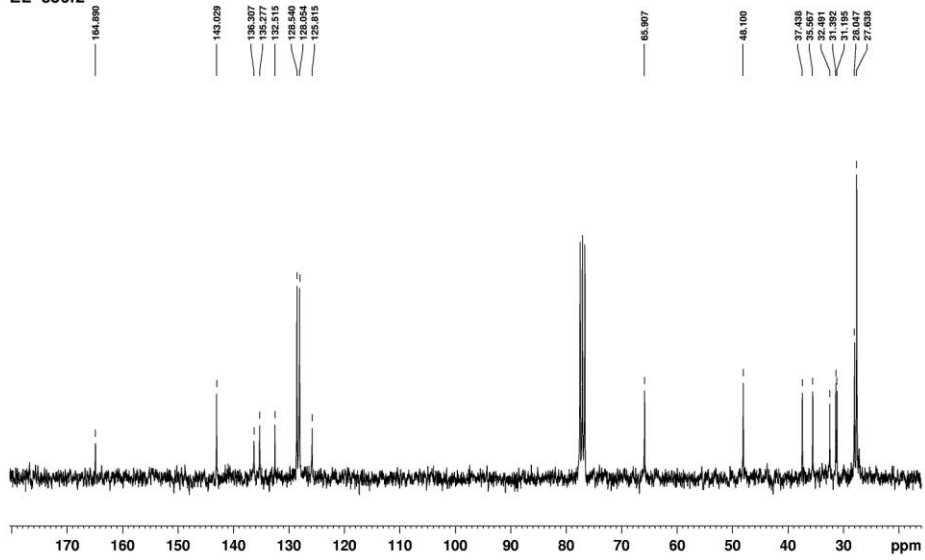

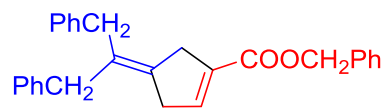

3h

EL-350f3

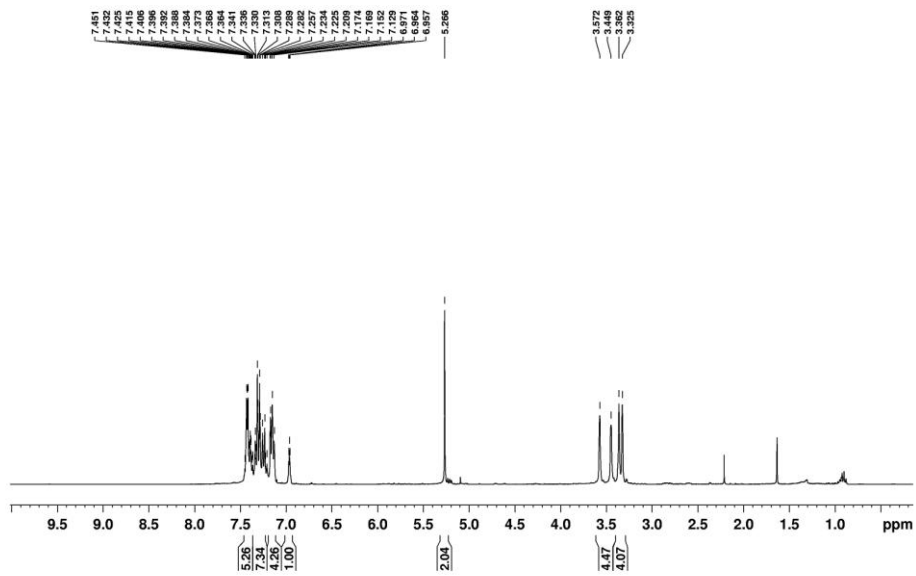

EL-350F3

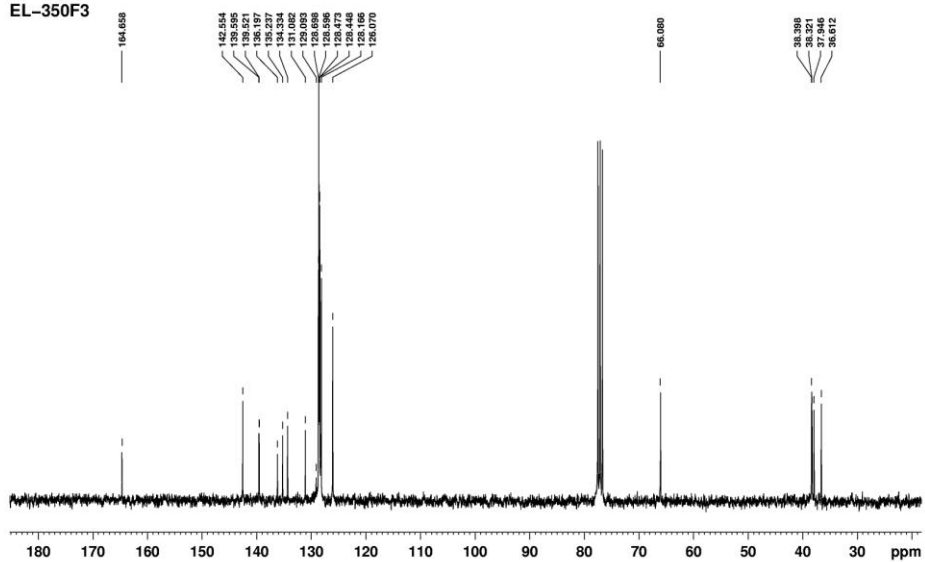

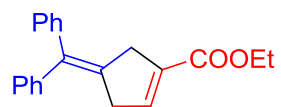

3i

GL-1083f3

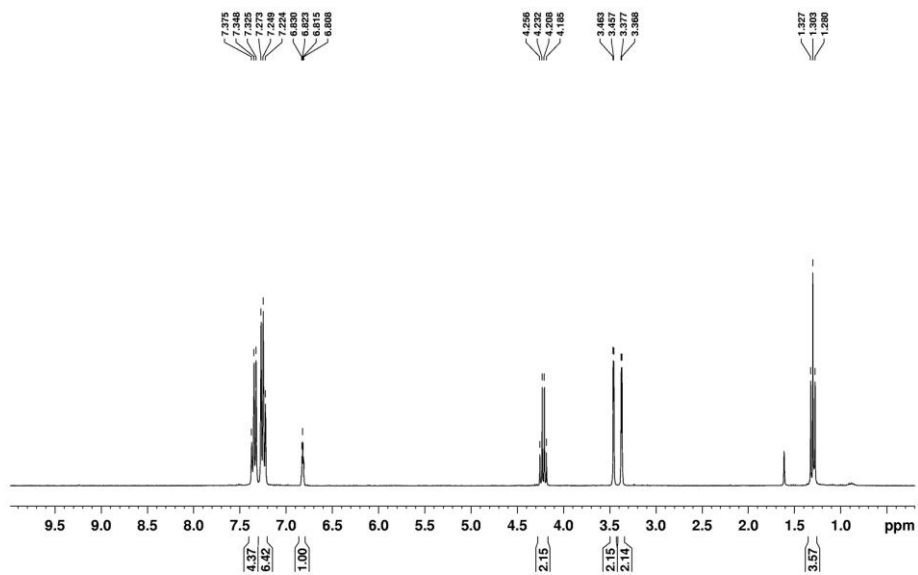

gl1083f3 C13 CPD DPX300

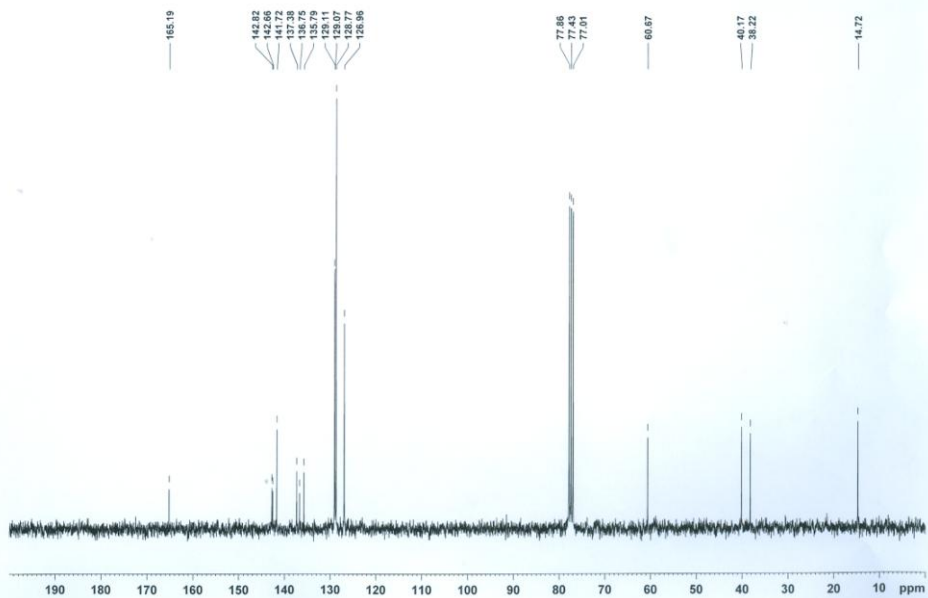

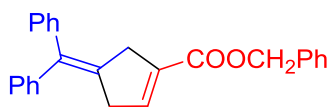

**3j**

EL-27012

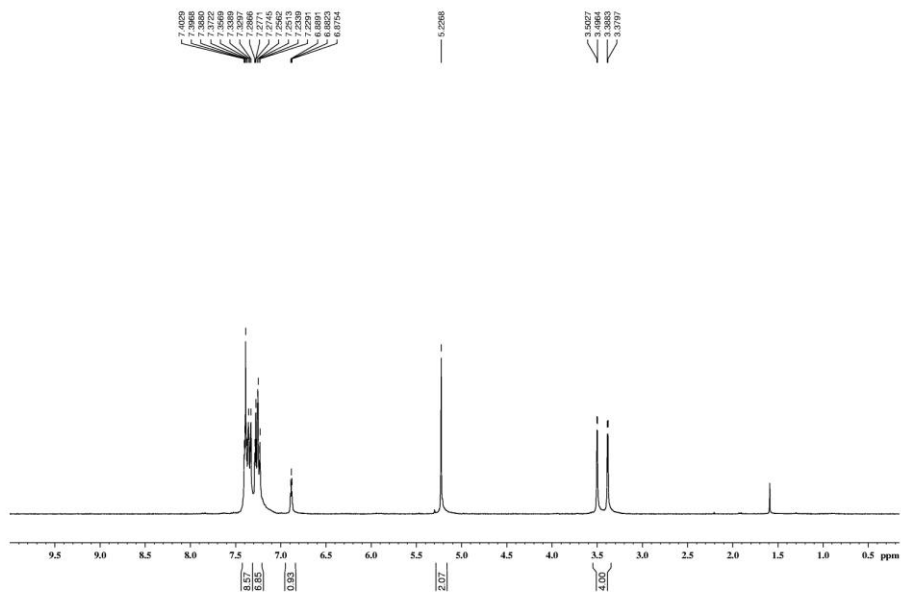

EL-27012

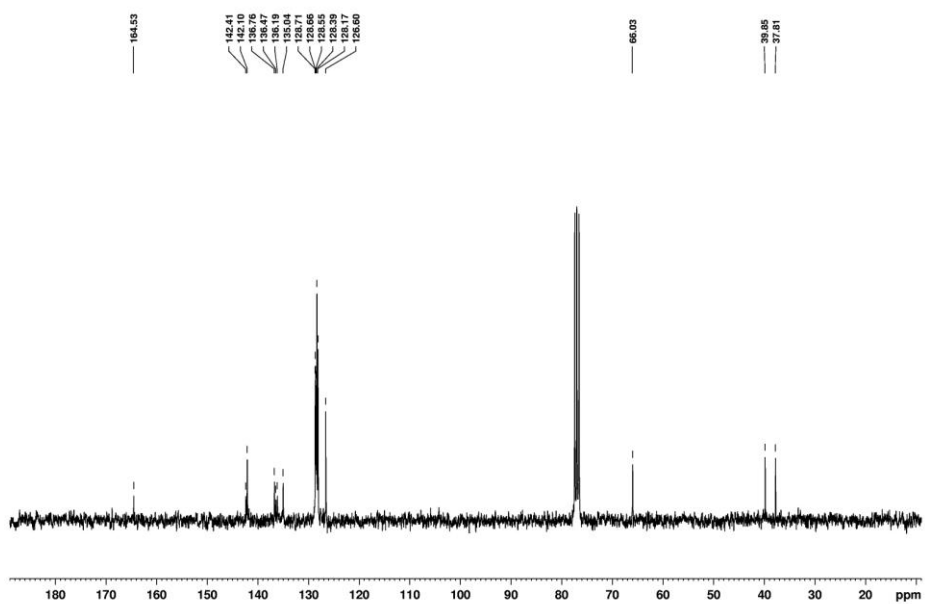

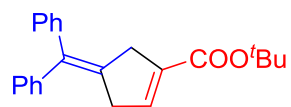

3k

EL-271f2

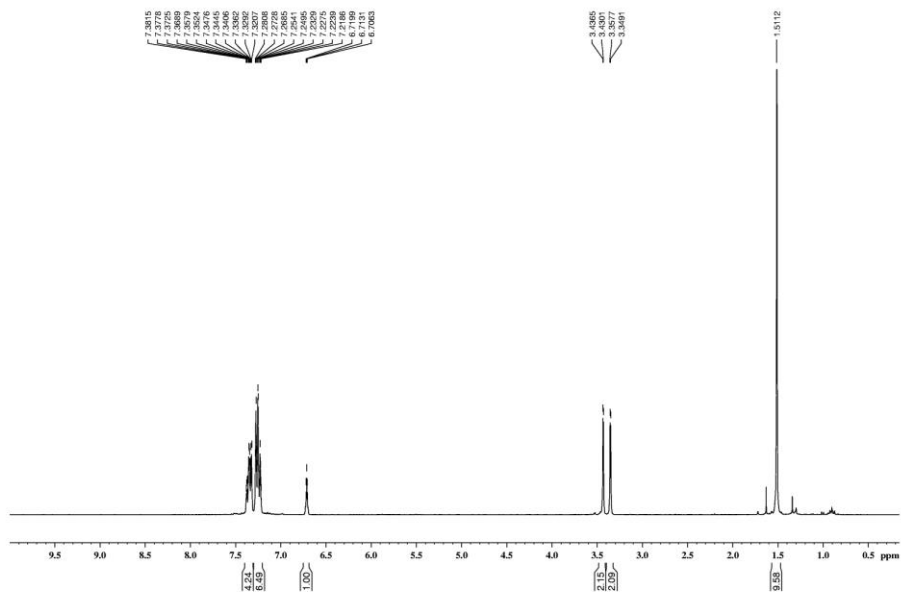

EL-271f2

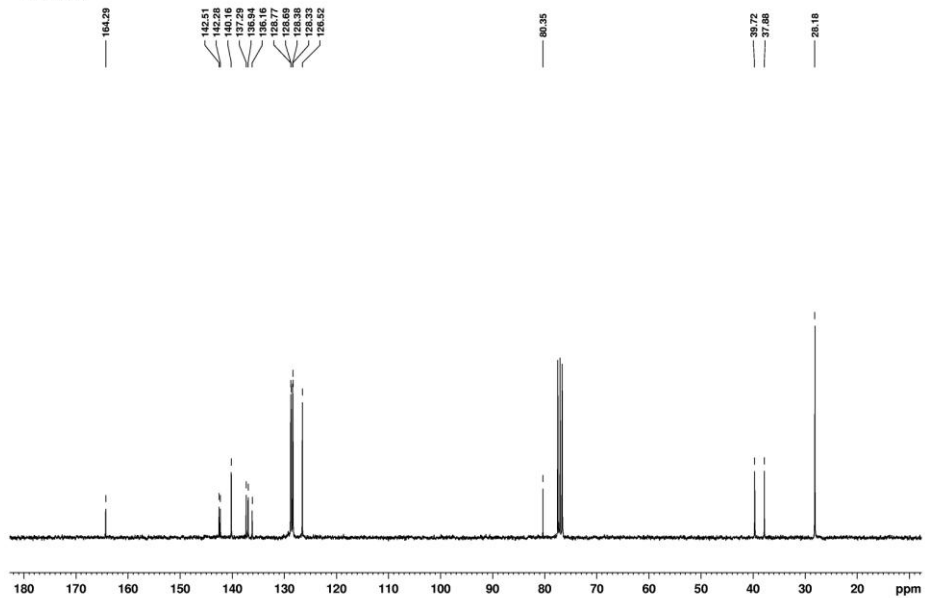



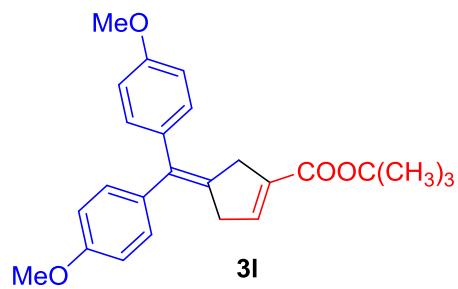

EL-335f3f2

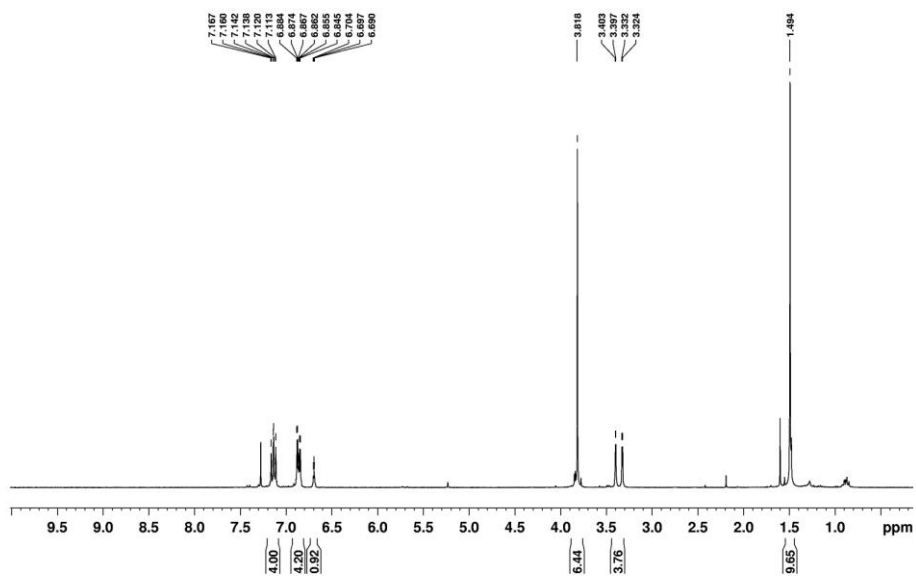

EL-335f3f2recol

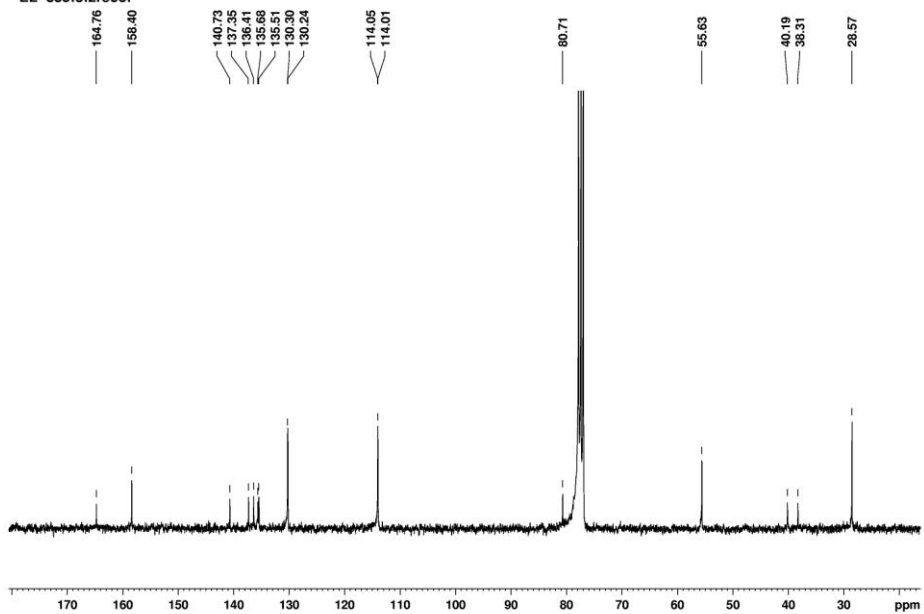

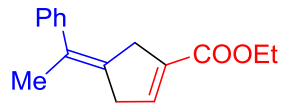

3m

GL-1088F2

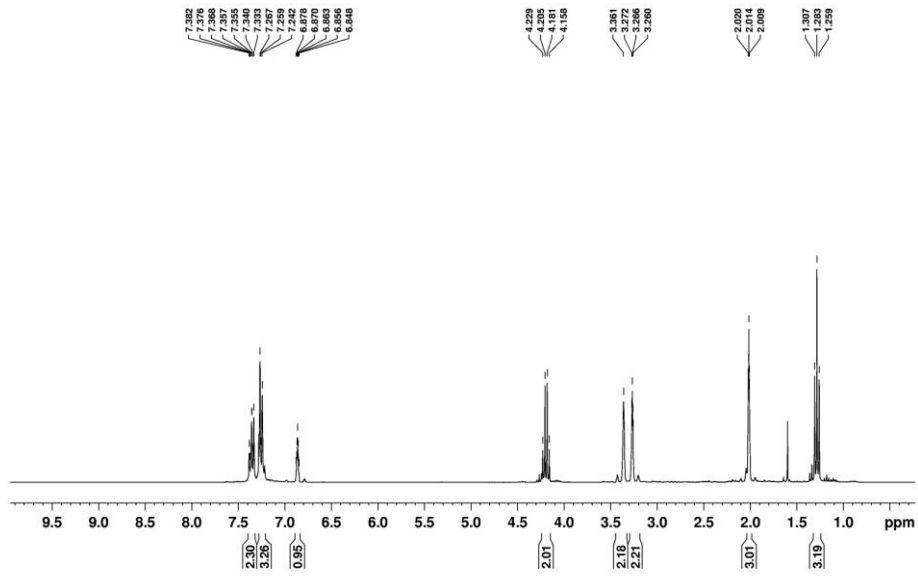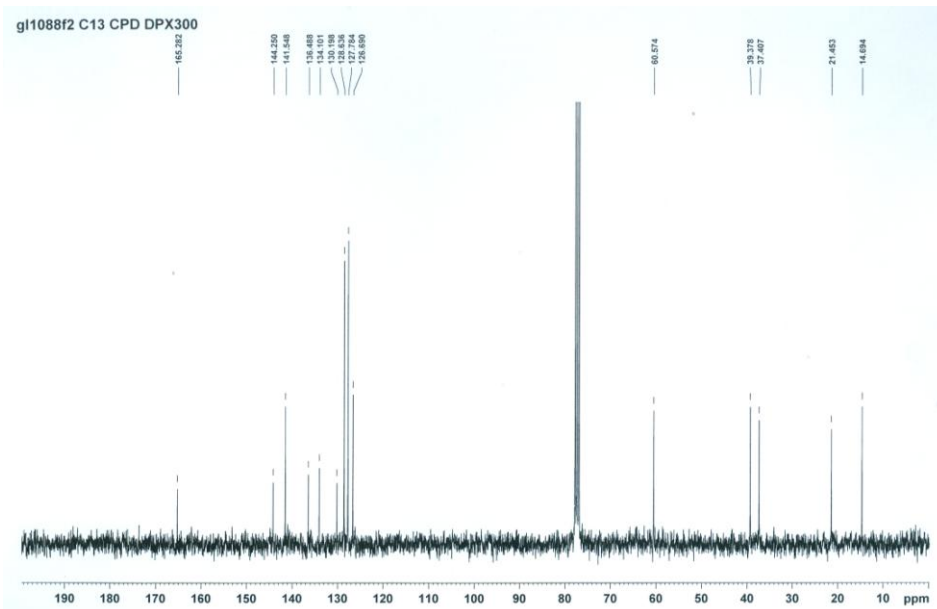

NOESY experiment (400 MHz, CDCl<sub>3</sub>) for compound **3m**

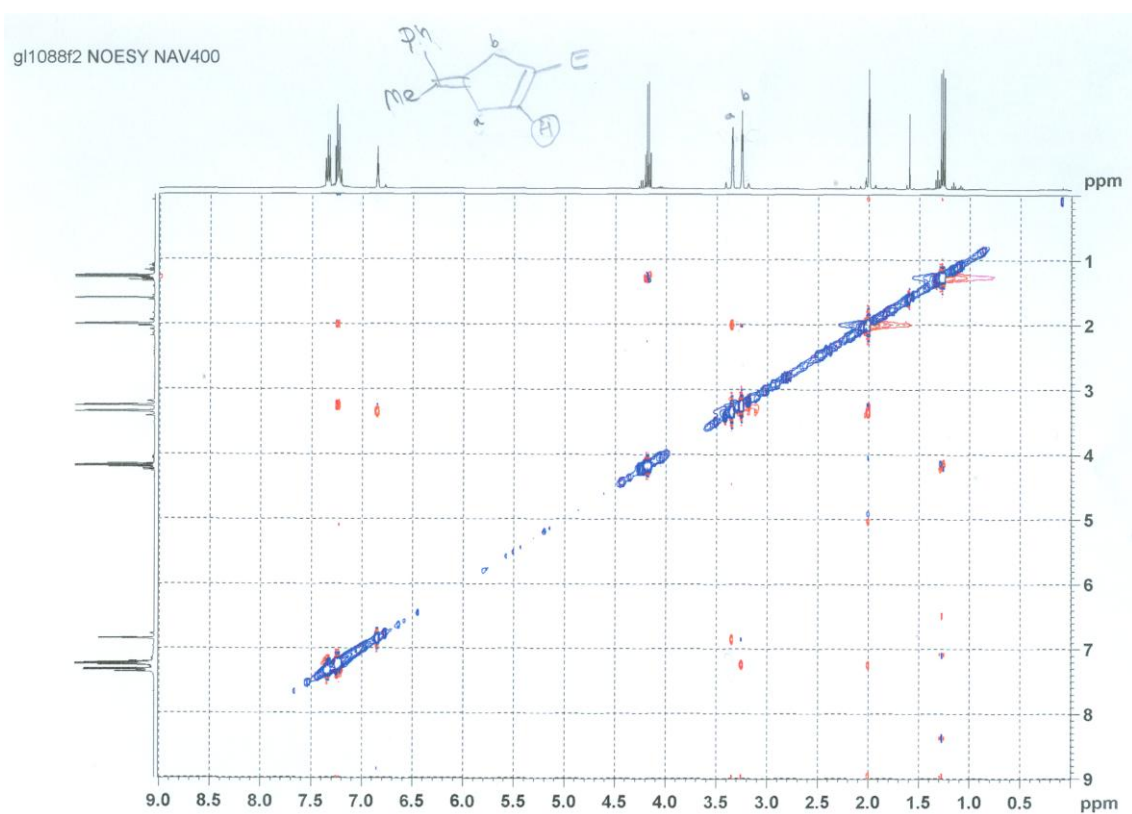

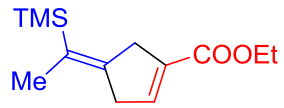

3n

EL-340f1\_600

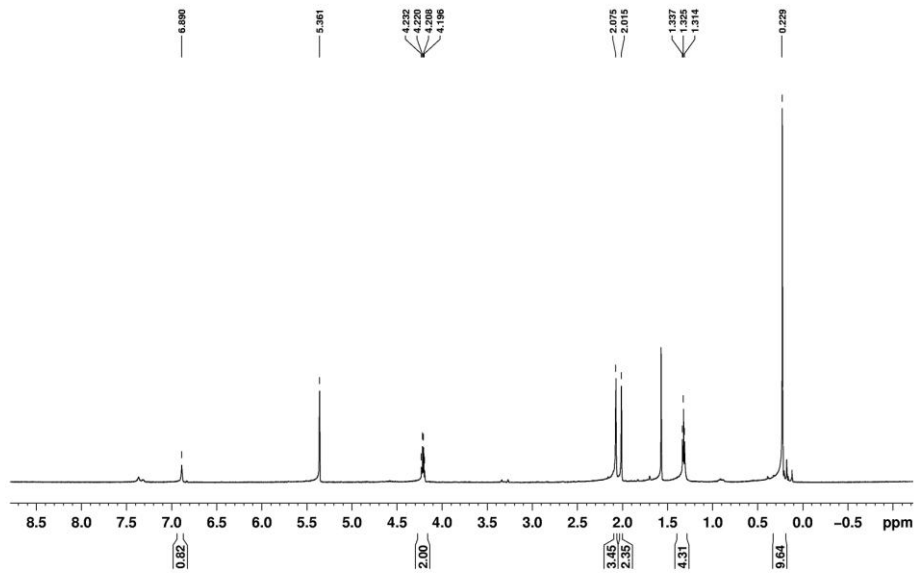

EL-340f1\_60

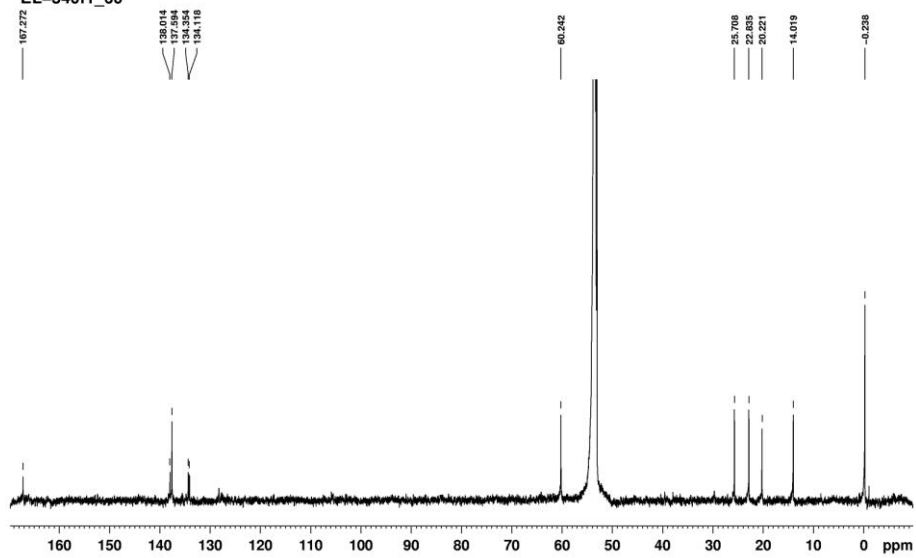

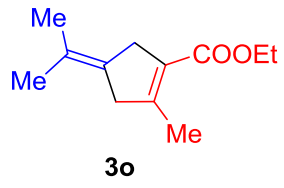

EL-2611f

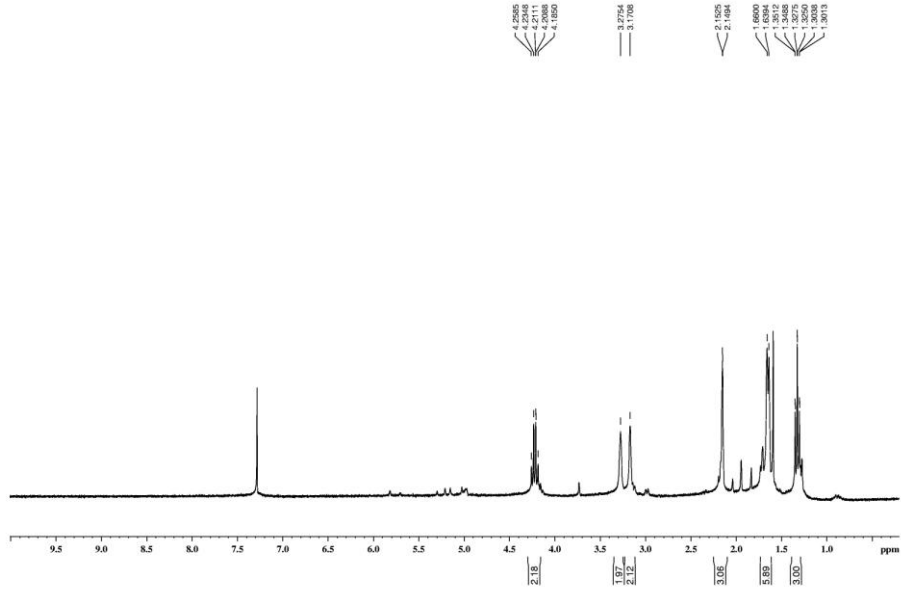

EL-2611f

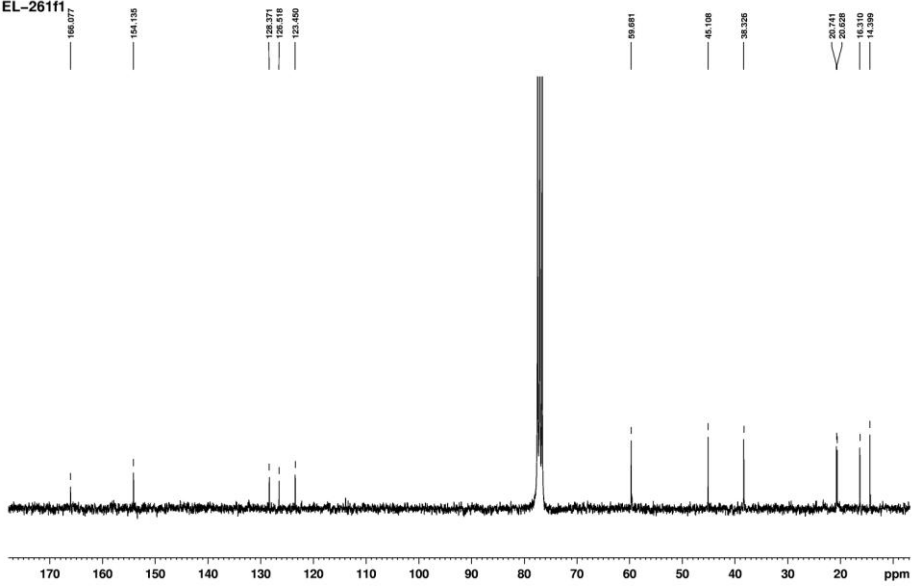

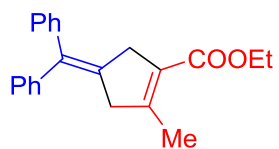

3p

EL-284f2\_1

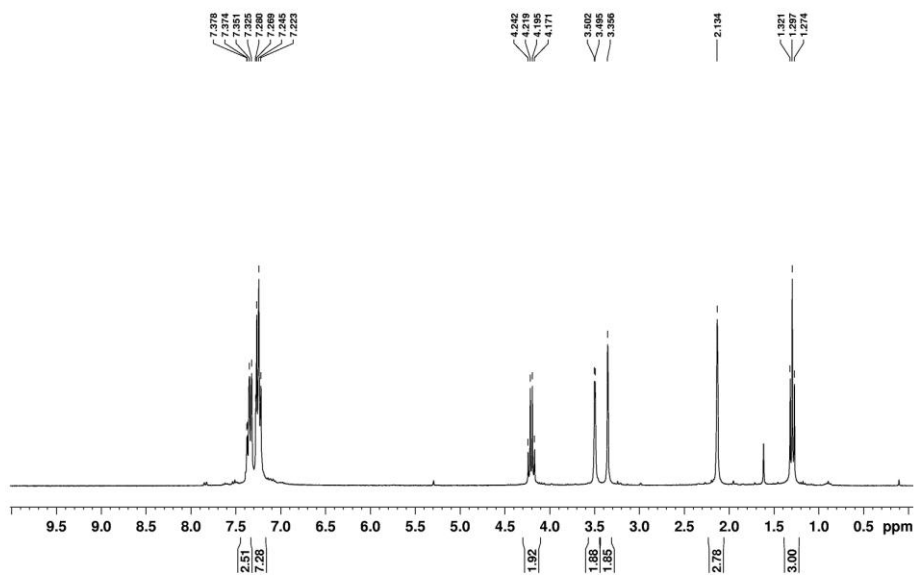

EL-284f2

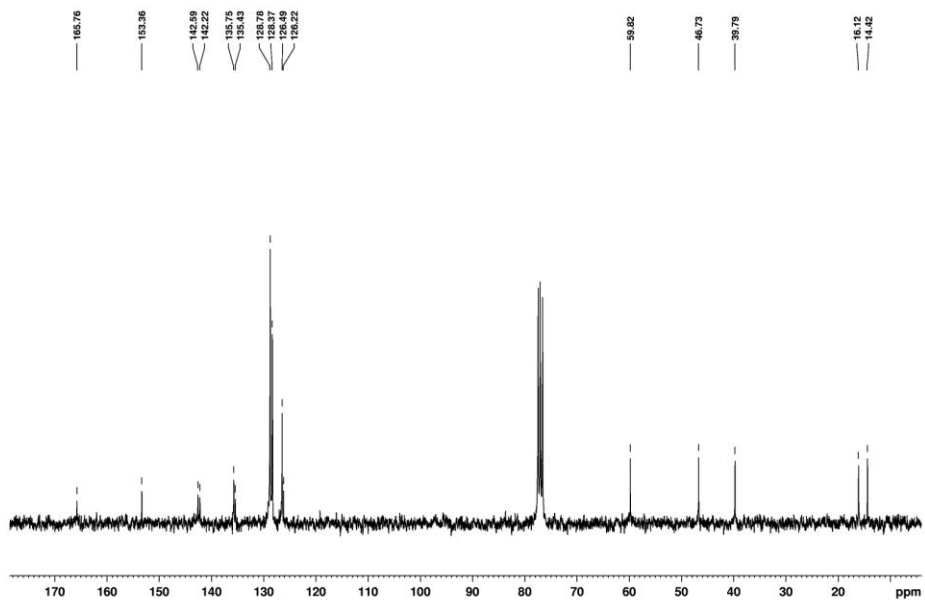

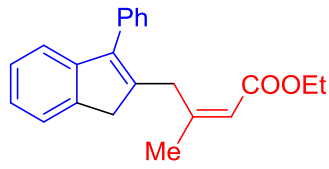

3p'

EL-284f1

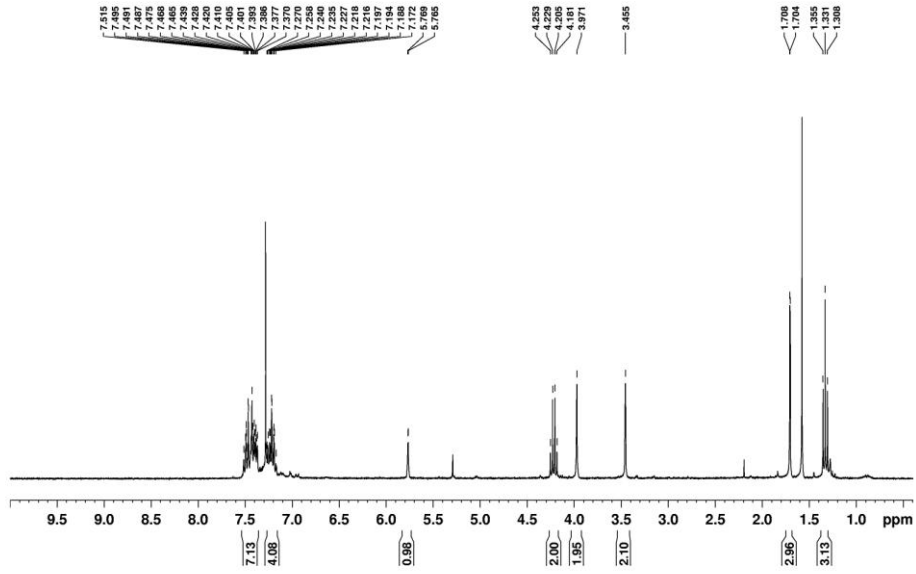

EL-284f1

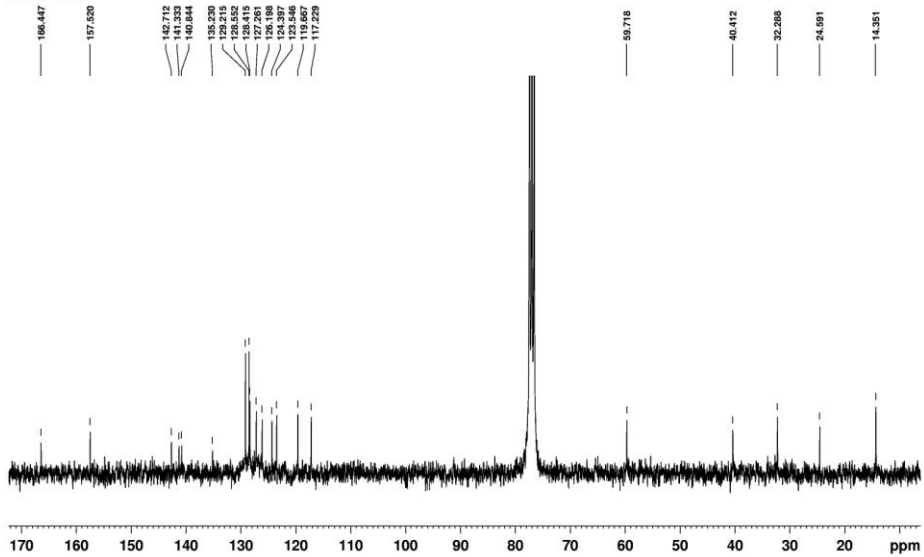

NOESY experiment (400 MHz, CDCl<sub>3</sub>) for compound **3p'**

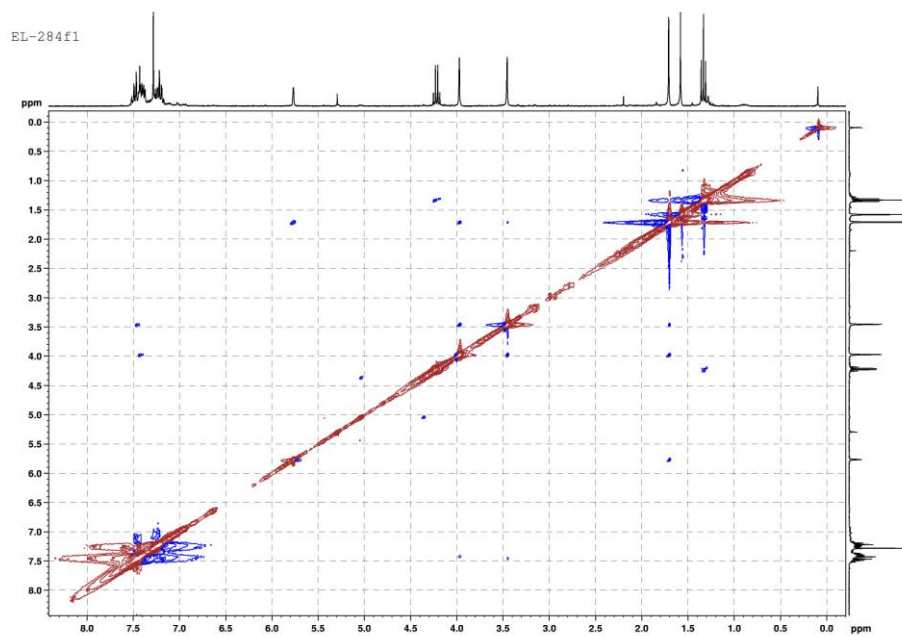



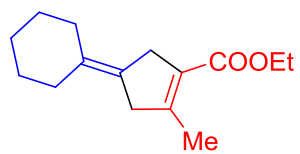

3q

EL-283f5f1

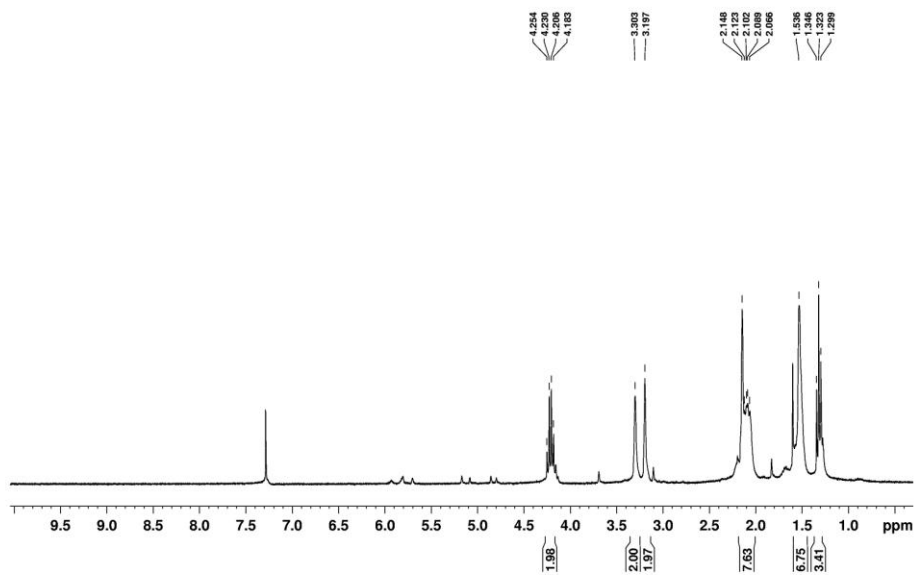

EL-283f5f1

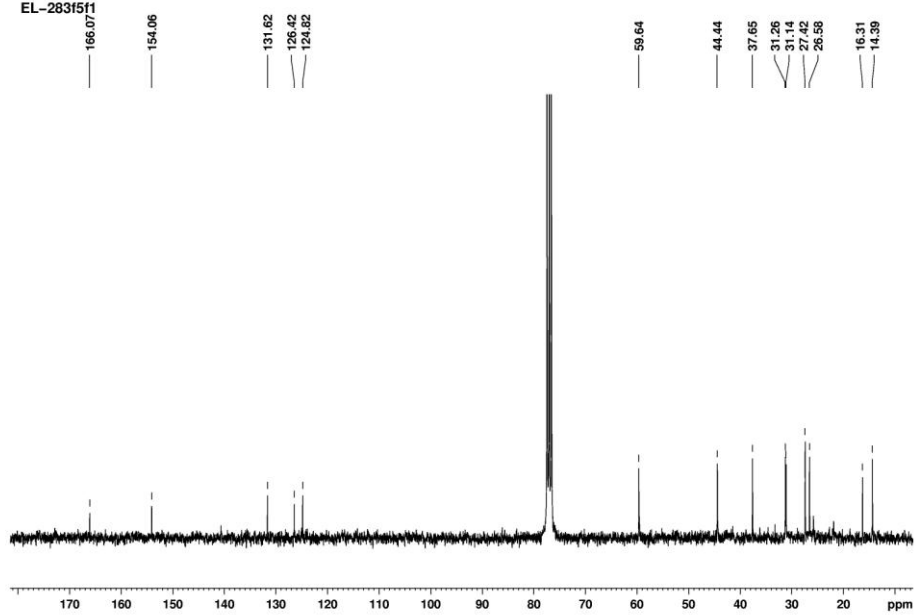

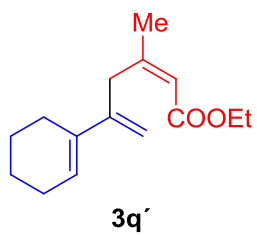

EL-283F2

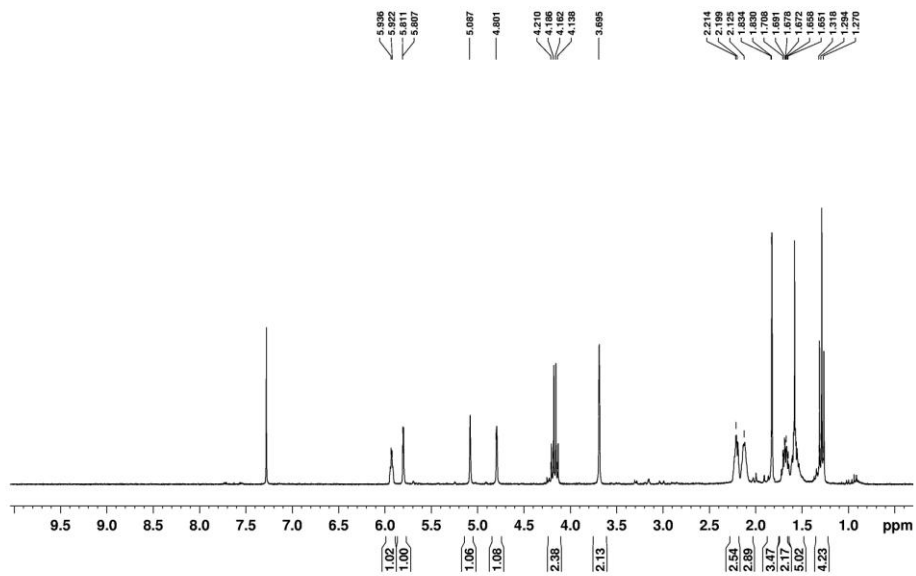

EL-283F2

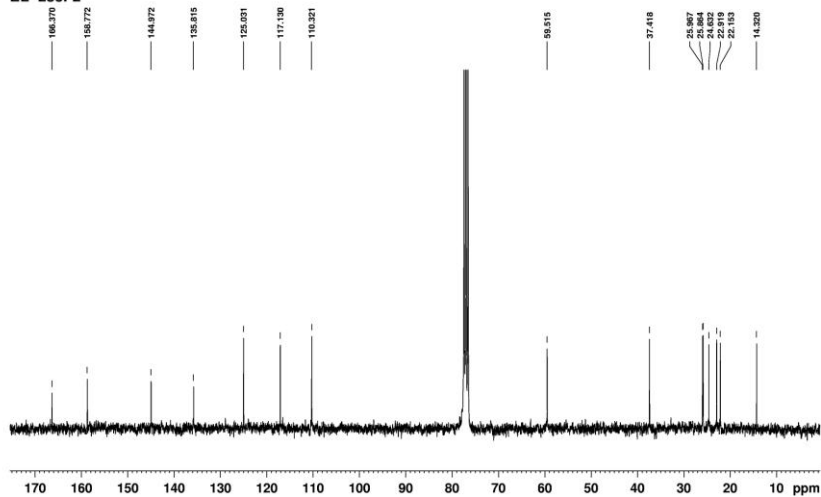

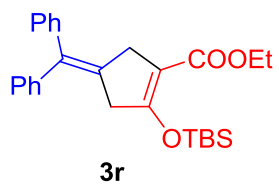

EL-352F1

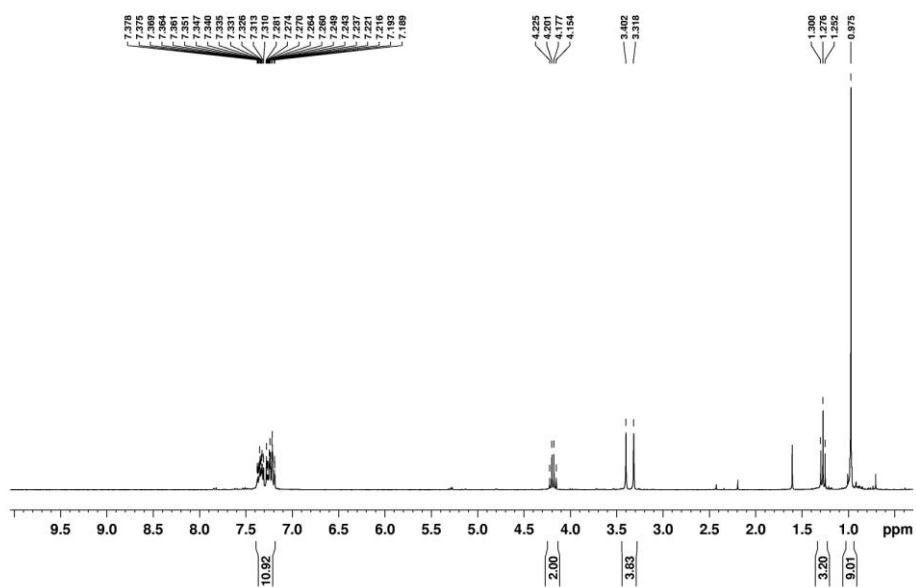

EL-352f1

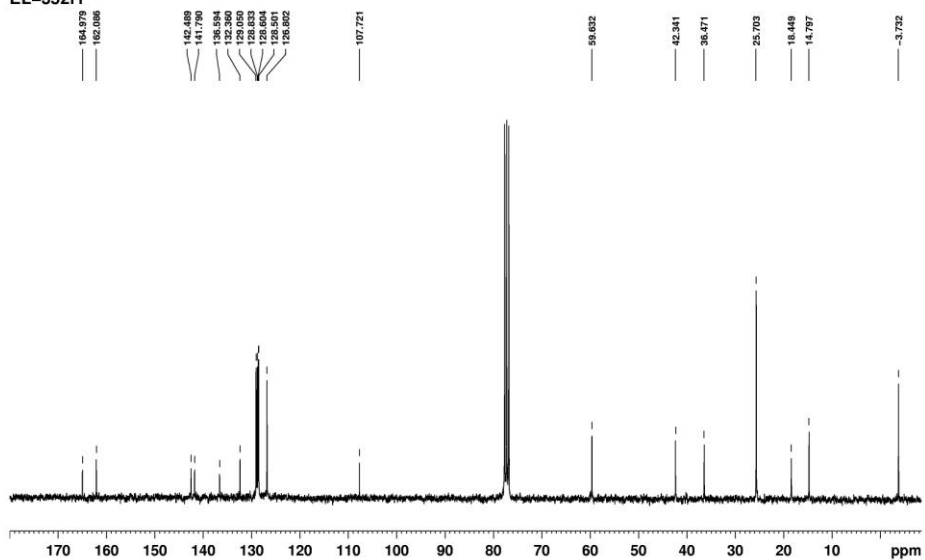

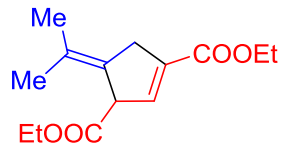

**3s**

EL-231F3

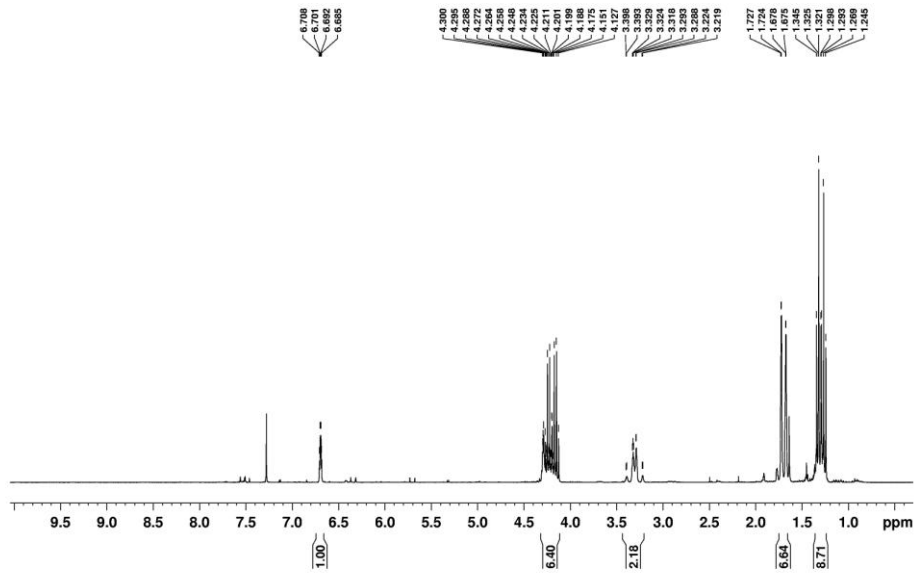

EL-231f3

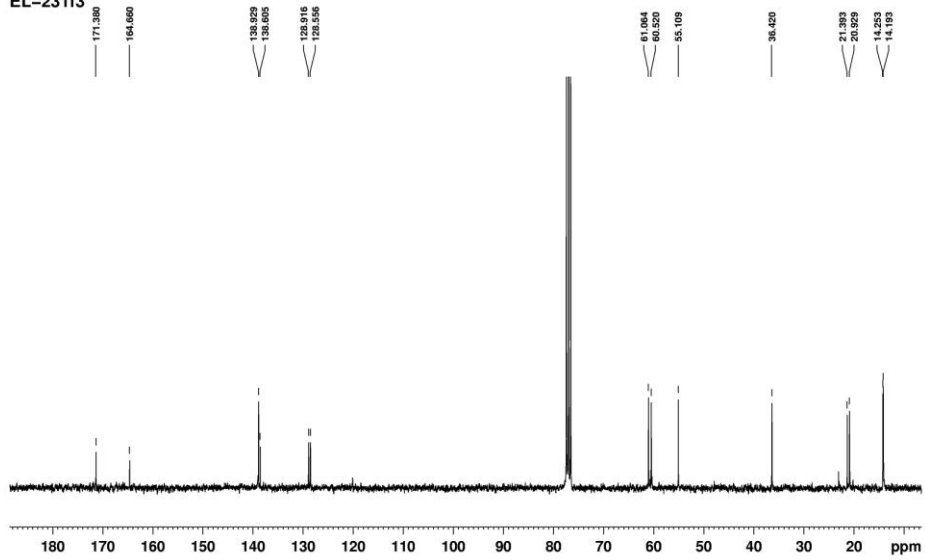

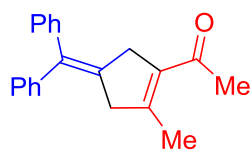

3t

EL-196f3

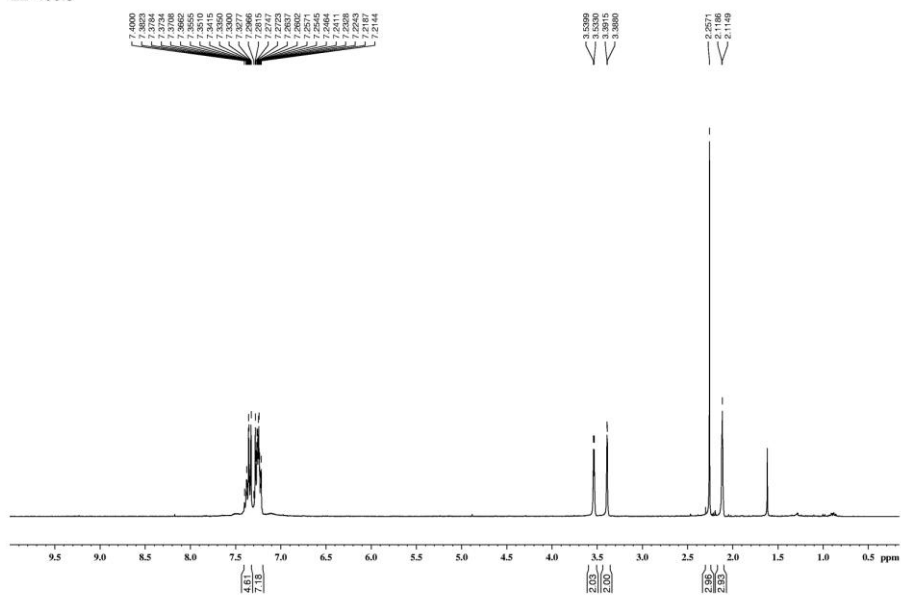

EL-196f3

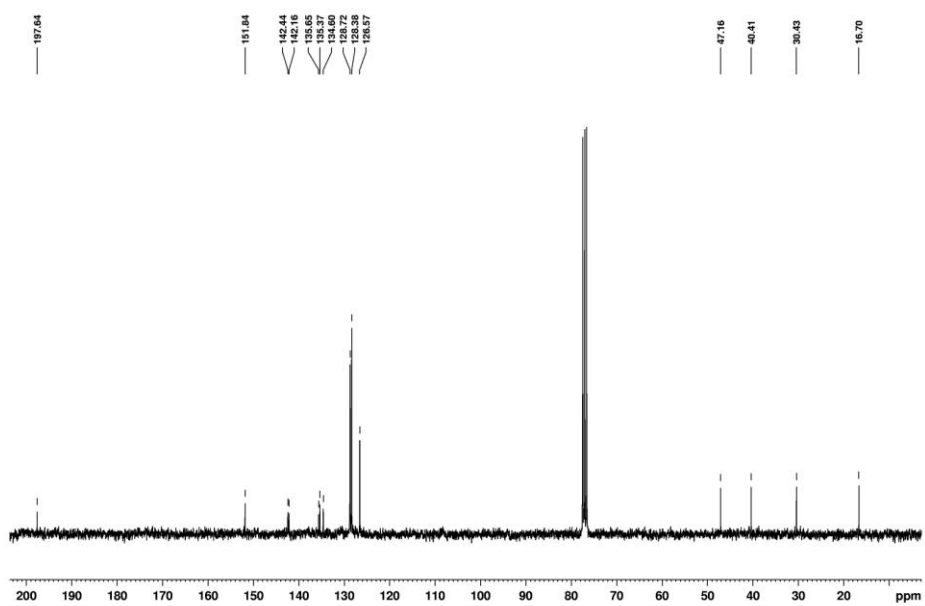

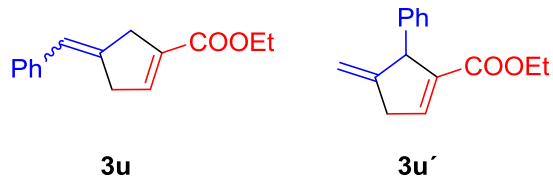

EL-1078f1

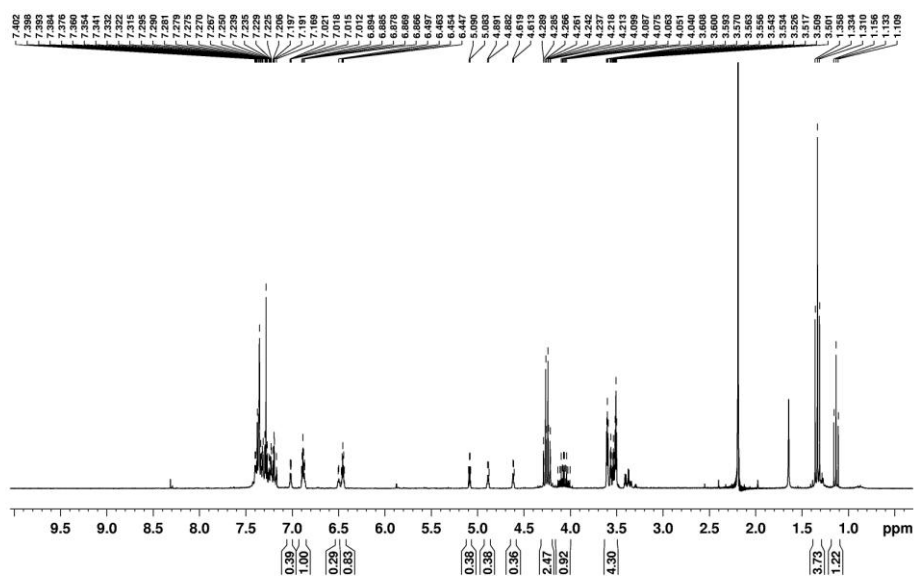

GL-1078f1

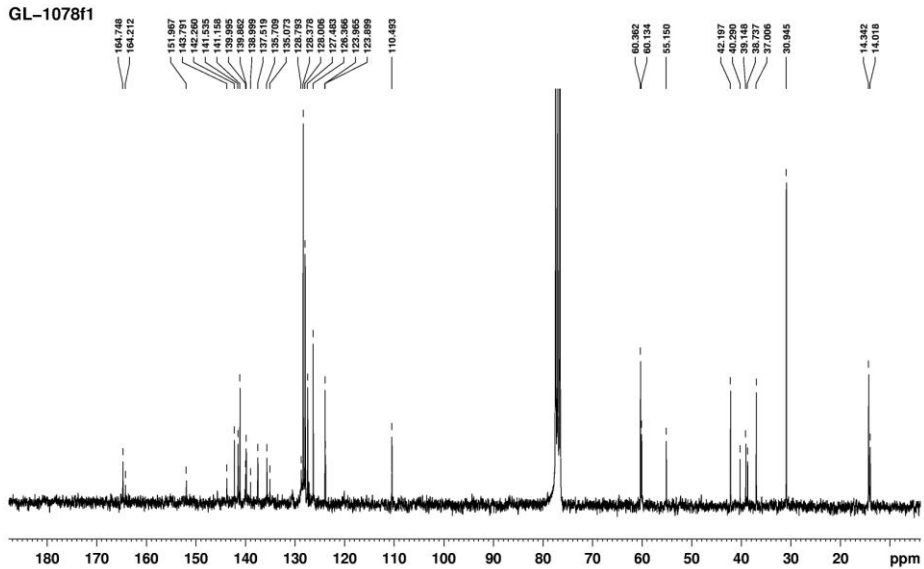

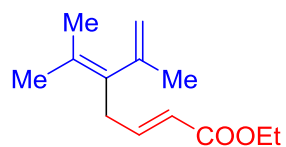

4a

GL-1081f3

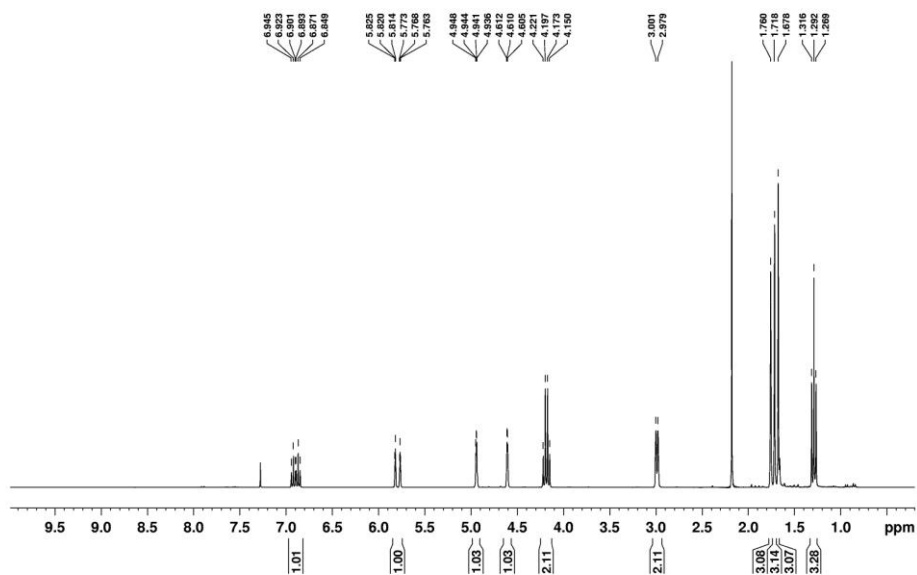

gl1081f3 C13 CPD DPX300

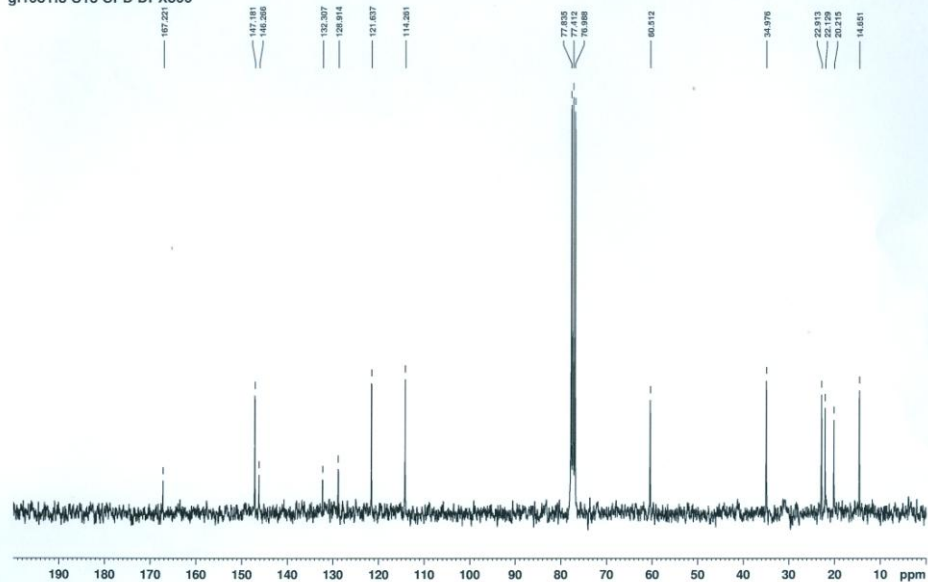

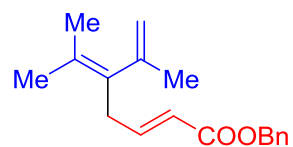

4b

EL-412F2\_1H

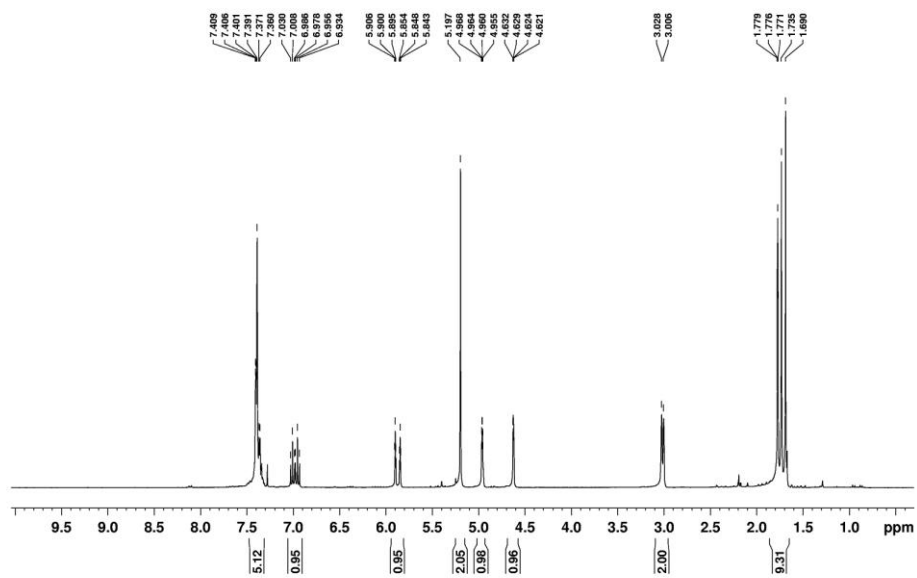

EL-412f2

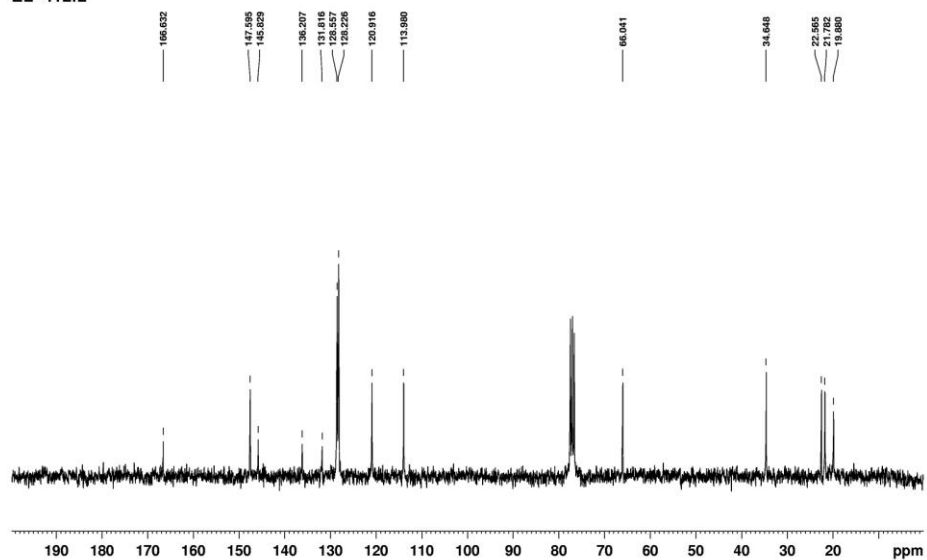



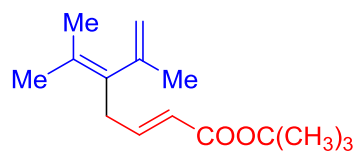

4c

EL-254f2

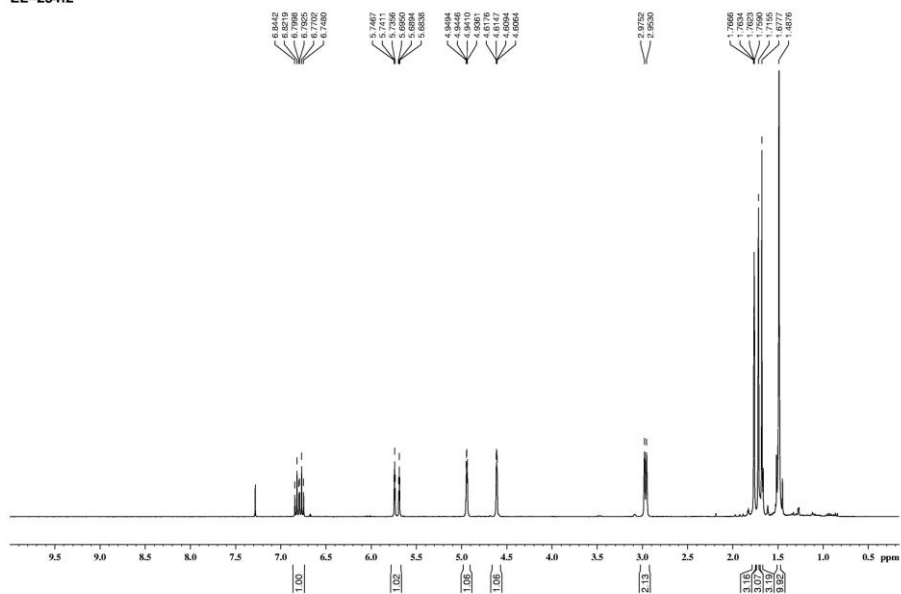

EL-254f2

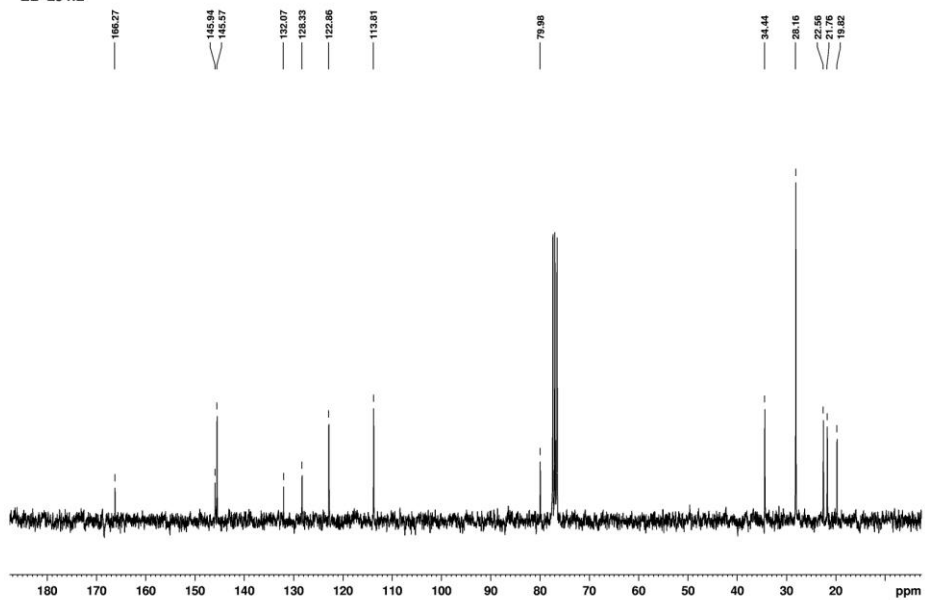

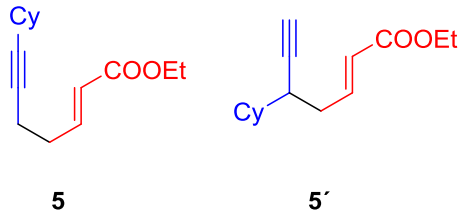

EL-210f2

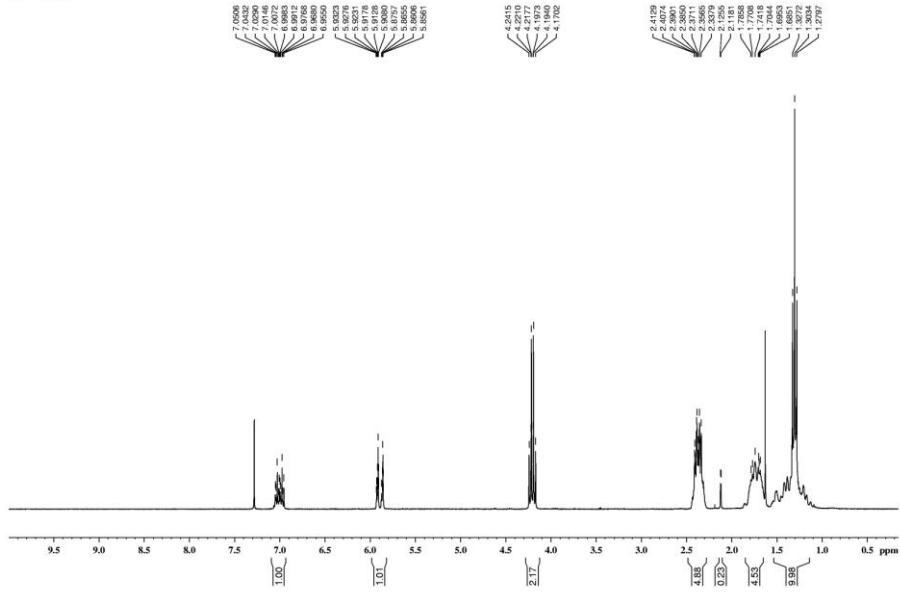

EL-210f2

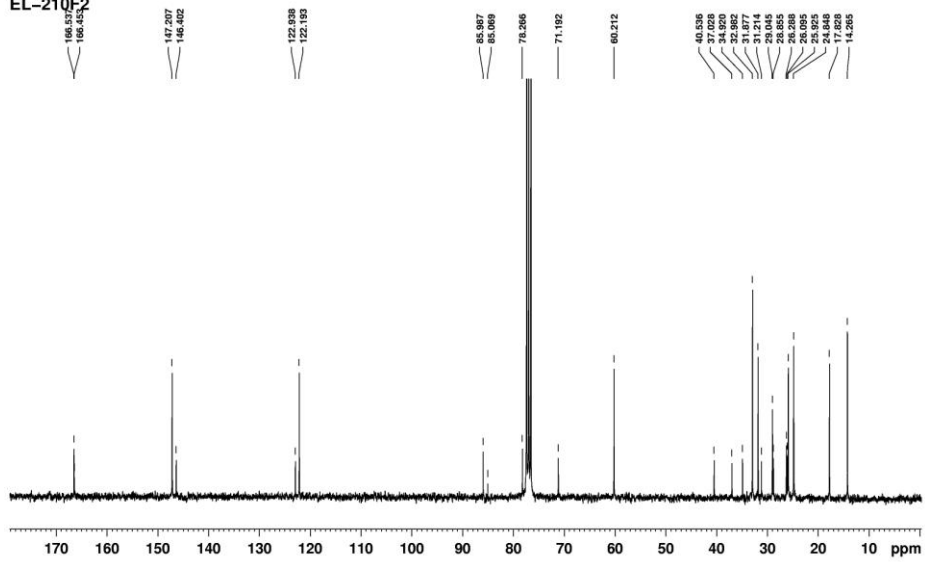

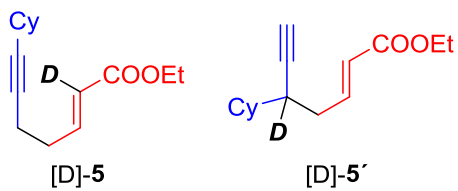

EL-443f2

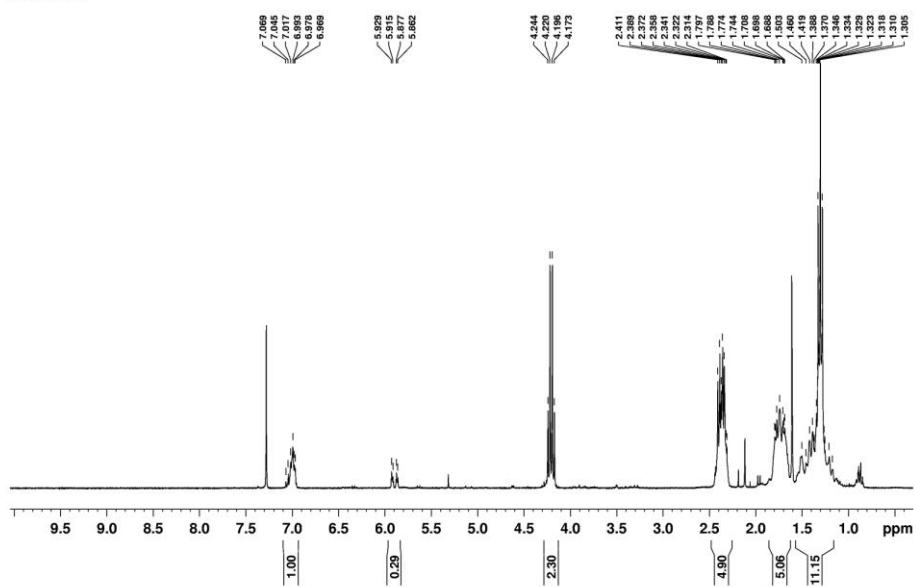

EL-443F2

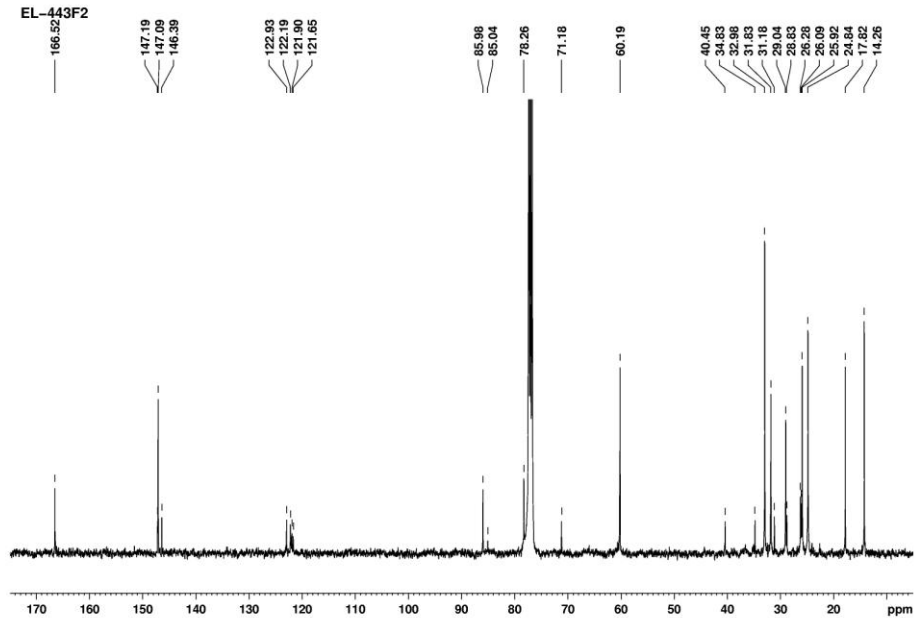

Supplement: c6cc04106j1.pdf [file c6cc04106j1.pdf]
